# Supplementary material
Source: Research Square preprint supplement (doi:10.21203/rs.3.rs-8598823/v1)
Supplement: Supplementary file 1 [file 839945115bcd0bbfc92f9a2f.xlsx]

## Sheet: Supplementary_File_2_De-identif
Serial Number	Time spent completing the questionnaire (seconds)	（1）gender	（2）age	（3）Your identity	（4）only child	（5）marriage	（6）living situation	（7）Educational background	（8）Do you have work experience prior to residency training	If yes（1）, please fill in the duration of work experience (months)	（9）Departmen	（10）Have you passed the National Medical Licensing Examination?	（11）Training grade	（12）Monthly income (RMB):	（13）Monthly consumption (RMB):		（14）Do you have night shifts?	（15）If yes, how many night shifts per month recently？	（16）Average monthly on-call frequency since the start of residency training:	（1）（17）Weekly working hours (mean):	dayly working hours (mean):	（18）Does your residency training work bring you a sense of accomplishment?	（19）What is your attitude towards the residency training system?	（20）What is your attitude towards the residency training hospital?	（21）What is your attitude towards the residency training department?	（22）What is your attitude towards the residency training tutor?	（23）How would you perceive your work stress?	（24）Have you ever had conflicts with the department faculty?	（25）Have you ever had a conflict with a patient?	（26）Do you smoke?	（27）Do you drink alcohol?	Insomnia Index	Insomnia symptoms	Difficulty falling asleep	Difficulty maintaining sleep	Early awakening	How satisfied are you with your current sleep patterns?	To what extent does insomnia affect your daily functioning?	How do you think others see your insomnia	Your level of distress about your current sleep problems	Pressure Gauge Scores	Anxiety Scale Score	Depression Scale Scores	pressure rating	anxiety level	Depression level	I find it difficult to quiet myself and rest.	My mouth feels dry.	I don't seem to be able to be positive at all
1	285�	1	27	2	0	4	2	1	0	(skip)	General Dentistry	1	3	3	2		0	1	1	40	8	1	1	1	1	1	2	1	1	1	0	3	0	0	0	0	0	0	0	3	0	0	0	1	1	1	0	0	0
2	296�	1	24	2	1	5	1	1	0	(skip)	general medicine	0	1	2	2		1	1	1	40	7	2	2	2	2	2	2	1	1	1	0	7	0	1	1	1	1	1	1	1	2	4	2	1	1	1	1	1	0
3	438�	1	26	1	0	5	5	1	0	(skip)	psychiatry	1	2	1	2		1	1	2	40	7	2	2	3	2	2	3	1	1	1	0	15	2	2	2	1	3	3	2	2	20	20	20	2	3	2	1	2	2
4	446�	0	26	1	0	5	2	1	0	(skip)	psychiatry	1	2	2	3		1	2	2	56	10	1	1	1	1	1	1	1	2	1	0	3	0	0	0	1	1	1	0	0	8	4	4	1	1	1	0	1	1
5	298�	0	25	3	0	4	1	2	0	(skip)	anesthesiology	0	1	1	2		1	1	1	60	12	2	2	2	2	1	3	1	1	1	0	13	1	2	3	2	4	1	1	0	8	6	4	1	1	1	1	0	0
6	510�	0	26	2	0	4	1	1	0	(skip)	radiology	1	2	3	2		0	1	1	32	8	1	1	1	1	1	2	1	1	1	0	1	0	0	0	0	1	0	0	0	0	0	0	1	1	1	0	0	0
7	516�	0	30	1	1	2	1	1	1	2019年	general medicine	1	3	2	3		1	4	4	50	10	2	2	2	2	1	2	1	1	1	0	8	1	1	0	1	2	2	1	1	14	8	4	1	1	1	1	1	1
8	510�	0	30	1	0	1	1	1	1	78	general medicine	1	3	1	2		1	1	2	50	10	2	2	2	2	1	2	1	1	1	0	1	0	0	0	0	1	0	0	0	10	0	2	1	1	1	1	0	0
9	314�	1	27	2	0	2	1	1	0	(skip)	oral and maxillofacial surgery	1	3	3	2		1	1	1	40	8	1	1	1	1	1	2	1	1	1	0	3	0	1	1	0	1	0	0	0	2	4	0	1	1	1	0	0	0
10	398�	1	29	1	1	2	5	1	1	2020.09	anesthesiology	1	1	2	3		1	2	2	50	10	1	1	1	1	1	2	1	1	2	0	3	0	0	0	0	1	1	0	1	2	0	0	1	1	1	1	0	0
11	196�	1	27	3	0	2	5	2	0	(skip)	orthopedic surgery	1	3	1	2		1	2	2	50	8	2	3	2	2	2	2	2	2	2	1	0	0	0	0	0	0	0	0	0	0	0	0	1	1	1	0	0	0
12	589�	1	29	1	0	2	1	1	0	(skip)	neurosurgery	1	1	2	2		1	3	3	70	9	3	2	2	2	2	2	1	1	1	0	16	2	2	2	3	3	2	2	2	18	18	24	2	3	3	2	3	2
13	519�	0	25	3	0	4	6	1	0	(skip)	anesthesiology	1	2	1	2		1	2	2	60	12	3	3	2	3	2	3	1	1	1	0	13	1	3	2	1	3	1	1	2	20	18	12	2	3	2	2	3	1
14	650�	0	25	1	0	4	1	1	0	(skip)	general medicine	0	1	1	1		1	1	1	40	8	1	1	1	1	1	2	1	1	1	0	4	0	1	0	0	1	1	1	0	0	0	0	1	1	1	0	0	0
15	506�	0	25	1	0	5	4	1	0	(skip)	general practice	1	3	2	3		1	2	2	40	8	2	2	2	2	1	2	1	2	1	0	15	2	3	2	1	3	2	2	2	16	16	8	2	3	1	2	3	0
16	209�	0	26	3	0	5	1	1	0	(skip)	general medicine	1	3	1	1		1	2	2	40	8	2	3	2	2	1	2	1	2	1	0	8	1	1	1	1	2	1	1	1	4	0	0	1	1	1	0	0	0
17	226�	1	24	2	0	5	1	1	0	(skip)	oral and maxillofacial surgery	0	1	3	4		1	1	1	56	8	1	1	1	1	1	1	1	1	1	1	1	0	0	0	0	1	0	0	0	0	2	0	1	1	1	0	1	0
18	239�	1	27	2	0	4	4	1	1	2025年9�	(sth. or sb) else	0	1	1	5		1	4	4	60	10	3	3	3	3	3	3	3	3	2	1	28	3	4	4	4	4	4	4	4	42	42	42	3	3	3	3	3	3
19	266�	0	26	3	0	2	6	2	0	(skip)	general medicine	1	3	1	2		1	3	2	119	17	3	3	3	3	3	3	2	1	1	0	28	3	4	4	4	4	4	4	4	42	42	42	3	3	3	3	3	3
20	312�	0	25	3	0	2	1	2	0	(skip)	general medicine	1	3	1	2		1	3	3	50	8	2	2	2	2	2	3	1	1	1	0	8	1	1	1	1	1	2	1	1	20	14	16	2	2	2	1	1	1
21	245�	0	26	3	1	2	1	1	0	(skip)	general medicine	1	3	1	2		1	2	2	40	8	1	1	1	1	1	2	1	1	1	0	0	0	0	0	0	0	0	0	0	0	0	0	1	1	1	0	0	0
22	348�	0	31	3	0	1	5	1	1	5	department of gynecology and obstetrics	1	3	2	3		1	2	2	60	10	2	2	2	2	1	2	2	2	1	0	4	0	1	1	1	1	0	0	0	4	2	8	1	1	1	0	0	0
23	305�	1	25	2	1	4	1	1	0	(skip)	General Dentistry	1	1	2	2		1	1	1	40	8	1	1	1	1	1	2	1	2	1	0	5	0	0	0	1	2	1	0	1	6	4	2	1	1	1	0	1	0
24	337�	1	27	2	0	2	2	1	0	(skip)	neurosurgery	0	1	2	3		1	2	2	40	8	2	2	2	2	1	2	1	1	2	0	2	0	0	0	1	1	0	0	0	0	0	0	1	1	1	0	0	0
25	339�	1	25	3	0	5	4	1	0	(skip)	critical care medicine	1	3	1	4		1	2	2	50	7	2	3	3	3	1	3	1	1	2	1	7	0	1	1	0	2	1	1	1	12	16	12	1	3	2	0	2	1
26	688�	0	25	1	0	5	1	1	0	(skip)	neurosurgery	1	2	2	2		0	2	2	40	8	2	1	1	1	1	2	1	1	1	0	1	0	0	0	0	1	0	0	0	0	2	2	1	1	1	0	1	1
27	405�	0	25	3	0	2	5	2	0	(skip)	general medicine	1	3	1	2		1	2	2	56	8	1	1	1	1	1	3	1	1	1	0	4	0	1	0	0	1	1	1	0	0	4	0	1	1	1	0	1	0
28	264�	1	25	3	1	4	2	1	0	(skip)	neurosurgery	0	1	1	2		1	3	3	35	7	2	2	1	1	1	2	1	3	1	0	2	0	0	1	0	1	0	0	0	6	2	2	1	1	1	0	0	0
29	357�	1	28	3	0	2	5	2	0	(skip)	neurosurgery	1	3	1	3		1	2	2	40	8	3	3	2	2	2	2	1	2	1	0	2	0	0	0	0	2	0	0	0	2	2	2	1	1	1	0	1	0
30	338�	1	27	3	0	2	1	2	0	(skip)	neurosurgery	1	3	1	1		0	1	1	40	8	1	2	2	2	1	2	1	1	1	0	0	0	0	0	0	0	0	0	0	0	0	0	1	1	1	0	0	0
31	294�	1	26	3	1	4	1	1	0	(skip)	general medicine	0	3	1	2		1	2	2	36	7	2	1	1	1	1	2	1	1	1	0	0	0	0	0	0	0	0	0	0	0	2	0	1	1	1	0	1	0
32	346�	0	26	3	0	2	5	1	0	(skip)	psychiatry	1	3	1	2		1	2	2	47.5	9.5	3	2	2	2	2	2	1	1	1	0	3	0	1	0	0	2	0	0	0	0	2	0	1	1	1	0	0	0
33	279�	1	28	2	0	5	4	1	0	(skip)	neurosurgery	0	3	1	2		1	4	2	48	8	2	1	1	1	1	2	1	1	2	1	1	0	0	0	0	1	0	0	0	0	6	0	1	1	1	0	2	0
34	294�	1	26	3	0	5	1	2	0	(skip)	anesthesiology	1	3	1	1		1	2	2	60	12	2	3	3	2	2	3	1	1	1	0	3	0	1	1	0	1	0	0	0	0	0	0	1	1	1	0	0	0
35	323�	0	27	1	0	4	1	1	0	(skip)	general practice	1	3	1	2		1	2	2	40	8	1	1	1	1	1	1	1	1	1	0	0	0	0	0	0	0	0	0	0	0	0	0	1	1	1	0	0	0
36	923�	0	31	1	0	1	1	1	1	30	Oral Rehabilitation	1	3	2	3		1	1	1	35	7	1	1	1	1	1	2	1	1	1	0	9	1	1	1	2	2	1	1	1	10	8	6	1	1	1	1	2	1
37	337�	1	24	3	0	4	1	1	0	(skip)	neurosurgery	1	3	1	2		1	3	3	49	7	3	3	3	3	2	3	1	3	1	0	17	2	2	3	3	2	2	2	3	42	36	20	3	3	2	3	2	3
38	337�	0	26	3	1	2	5	1	0	(skip)	emergency department	1	3	1	2		1	2	3	60	8.5	2	2	2	2	2	2	1	1	1	0	10	1	1	2	2	2	1	1	1	0	0	0	1	1	1	0	0	0
39	396�	1	27	3	0	2	1	2	0	(skip)	neurosurgery	0	1	1	3		1	1	1	50	7	2	2	2	2	2	2	1	1	1	1	1	0	0	0	0	1	0	0	0	2	4	6	1	1	1	0	0	0
40	323�	1	24	3	0	4	4	1	0	(skip)	anesthesiology	0	1	1	2		1	1	1	40	8	2	2	2	2	1	2	1	1	1	0	5	0	1	0	0	2	1	1	0	0	0	0	1	1	1	0	0	0
41	307�	0	40	3	1	1	2	1	0	(skip)	Clinical Pathology	1	3	1	1		0	1	1	40	8	1	1	1	1	1	1	1	1	1	0	0	0	0	0	0	0	0	0	0	0	0	0	1	1	1	0	0	0
42	289�	0	22	3	0	5	5	1	0	(skip)	otolaryngology	0	1	1	3		1	4	2	45	8	2	2	2	2	2	2	1	1	1	0	0	0	0	0	0	0	0	0	0	2	10	2	1	2	1	0	3	0
43	349�	0	25	3	0	5	1	2	0	(skip)	general medicine	0	1	1	2		1	4	2	60	9	1	1	1	1	1	2	1	1	1	0	6	0	0	1	1	1	1	1	1	0	2	0	1	1	1	0	1	0
44	529�	1	26	3	0	4	1	1	0	(skip)	general medicine	1	3	1	2		1	2	2	56	8	3	3	2	2	2	3	1	2	1	0	12	1	2	2	2	2	2	1	1	6	6	6	1	1	1	1	2	1
45	396�	0	22	3	0	2	1	1	0	(skip)	general medicine	0	1	1	2		1	3	3	42	8	3	2	2	2	1	2	1	1	1	0	6	0	1	1	1	2	1	0	0	2	2	2	1	1	1	0	0	0
46	231�	1	27	3	0	2	1	2	0	(skip)	orthopedic surgery	0	2	1	2		1	2	2	80	12	2	1	1	1	1	2	2	1	1	1	8	1	1	1	1	2	1	1	1	10	8	2	1	1	1	1	0	0
47	507�	1	24	3	0	2	3	1	0	(skip)	general medicine	0	1	1	2		1	2	2	65	9	2	2	2	2	1	3	2	2	1	0	5	0	1	1	1	1	1	0	0	4	4	0	1	1	1	0	1	0
48	460�	0	24	3	0	5	3	1	0	(skip)	general medicine	0	1	1	3		1	2	2	50	7	2	2	2	2	1	2	1	2	1	0	4	0	1	0	1	1	1	0	0	0	0	0	1	1	1	0	0	0
49	255�	1	24	3	1	4	1	1	0	(skip)	orthopedic surgery	1	2	1	2		1	2	2	50	8	3	3	1	1	1	2	2	3	1	0	7	0	1	1	0	2	2	1	0	12	14	28	1	2	3	1	2	3
50	549�	0	24	3	0	4	1	1	0	(skip)	general medicine	0	1	1	2		1	2	2	50	10	2	2	1	1	1	1	1	1	1	0	2	0	0	0	1	1	0	0	0	4	2	0	1	1	1	0	0	0
51	672�	1	27	3	1	5	1	2	0	(skip)	orthopedic surgery	1	3	1	2		1	2	2	49	7	2	2	1	1	1	2	1	2	1	0	10	1	3	2	0	1	2	1	1	28	6	8	3	1	1	1	1	1
52	234�	1	24	3	0	2	6	2	0	(skip)	general medicine	0	2	1	1		1	2	3	80	10	3	3	3	3	3	3	3	3	2	1	17	2	4	4	0	3	2	2	2	22	24	24	2	3	3	2	2	2
53	506�	1	25	3	0	2	1	1	0	(skip)	neurosurgery	1	2	1	2		1	4	2	60	12	3	3	3	2	1	2	2	1	1	1	11	1	1	2	2	2	2	1	1	12	8	14	1	1	2	0	0	1
54	429�	0	24	3	0	5	5	1	0	(skip)	emergency department	1	2	1	2		1	3	4	72	12	2	2	2	2	1	2	2	2	1	0	1	0	0	0	0	1	0	0	0	4	0	0	1	1	1	1	0	0
55	803�	0	26	3	0	2	5	1	0	(skip)	general practice	1	3	1	1		0	1	1	48	8	1	2	2	2	2	2	1	1	1	0	1	0	0	0	0	1	0	0	0	10	4	2	1	1	1	0	1	0
56	276�	0	23	3	1	4	5	1	0	(skip)	(sth. or sb) else	0	2	1	2		1	2	2	40	8	2	2	2	1	1	1	1	1	1	0	0	0	0	0	0	0	0	0	0	0	0	0	1	1	1	0	0	0
57	212�	1	25	3	1	5	5	2	0	(skip)	general medicine	1	2	1	2		1	2	2	42	8	1	1	1	1	1	2	1	1	1	0	0	0	0	0	0	0	0	0	0	0	0	0	1	1	1	0	0	0
58	415�	1	27	3	1	5	1	2	0	(skip)	neurosurgery	0	1	1	1		1	2	2	42	7	1	1	1	1	1	1	1	1	1	0	0	0	0	0	0	0	0	0	0	0	0	0	1	1	1	0	0	0
59	257�	1	28	3	0	4	6	2	0	(skip)	neurosurgery	1	3	1	2		1	1	1	40	8	2	2	2	2	1	1	1	1	1	0	7	0	0	1	1	2	1	1	1	0	0	0	1	1	1	0	0	0
60	466�	1	26	3	0	4	3	2	0	(skip)	orthopedic surgery	0	2	1	1		1	2	2	60	8	1	1	1	1	1	1	1	1	1	0	0	0	0	0	0	0	0	0	0	0	0	0	1	1	1	0	0	0
61	439�	1	24	3	0	5	1	2	0	(skip)	orthopedic surgery	0	2	1	1		1	4	2	48	8	2	3	3	1	1	2	1	1	1	0	24	3	4	4	0	4	4	4	4	42	42	42	3	3	3	3	3	3
62	583�	0	26	2	0	4	2	1	0	(skip)	Oral Rehabilitation	0	1	2	2		1	1	1	45	9	1	1	1	1	1	2	1	1	1	0	1	0	0	0	0	1	0	0	0	4	2	0	1	1	1	0	0	0
63	409�	1	26	3	0	5	6	2	0	(skip)	orthopedic surgery	1	2	1	4		1	2	2	49	7	3	3	3	2	2	3	1	2	1	1	10	1	1	2	2	2	1	1	1	6	2	8	1	1	1	1	1	0
64	402�	1	25	3	0	4	3	2	0	(skip)	department of gynecology and obstetrics	0	2	1	1		1	2	2	68	10	2	3	2	2	2	2	1	1	1	0	0	0	0	0	0	0	0	0	0	8	6	16	1	1	2	0	0	3
65	511�	1	27	3	0	4	6	1	0	(skip)	critical care medicine	0	2	1	2		1	2	2	60	8	3	2	2	2	1	2	1	1	1	0	4	0	0	0	2	1	0	0	1	0	0	0	1	1	1	0	0	0
66	368�	0	26	3	0	4	3	2	0	(skip)	neurosurgery	1	2	1	2		1	2	2	45	8	3	3	3	3	2	2	1	2	1	0	8	1	1	1	1	2	1	1	1	12	8	12	1	1	2	1	2	2
67	352�	1	36	2	0	2	2	1	0	(skip)	General Dentistry	1	3	3	3		1	1	1	30	6	2	1	2	1	1	2	1	2	1	0	3	0	0	1	1	1	0	0	0	0	4	0	1	1	1	0	1	0
68	327�	1	26	3	0	2	1	2	0	(skip)	orthopedic surgery	1	3	1	2		1	2	2	72	12	3	3	3	3	3	3	1	1	1	0	19	2	2	3	4	4	2	2	2	14	2	8	1	1	1	1	0	1
69	521�	1	26	3	1	2	5	2	0	(skip)	orthopedic surgery	1	2	1	2		1	4	2	48	8	3	2	2	2	2	2	1	1	1	0	3	0	1	0	1	1	0	0	0	2	2	2	1	1	1	0	1	0
70	335�	0	24	3	1	2	1	2	0	(skip)	general medicine	0	1	1	2		1	4	4	50	9	2	2	2	2	2	3	1	1	1	0	1	0	0	0	0	1	0	0	0	4	4	4	1	1	1	0	1	1
71	883�	0	29	2	0	2	5	2	0	(skip)	radiology	1	1	2	3		0	1	1	40	8	2	2	2	2	1	2	1	1	1	0	1	0	0	0	0	1	0	0	0	4	4	2	1	1	1	0	1	0
72	570�	0	25	3	1	5	4	1	0	(skip)	general medicine	1	2	1	2		1	2	2	50	8	3	3	3	3	2	2	1	3	1	0	12	1	1	2	2	1	2	2	2	18	22	16	2	3	2	2	2	1
73	471�	0	33	3	0	2	3	2	1	2016.10-20	Skin and Sexually Transmitted Diseases	1	3	1	2		1	2	2	50	8	3	3	2	2	2	2	2	2	1	0	9	1	2	1	0	2	1	2	1	8	8	2	1	1	1	0	1	0
74	332�	1	25	3	0	5	3	2	0	(skip)	emergency department	1	3	1	2		1	3	3	40	8	2	2	2	2	1	2	1	1	1	0	6	0	1	1	1	1	1	1	0	16	10	8	2	2	1	1	1	1
75	1001�	0	24	3	0	5	1	1	0	(skip)	department of gynecology and obstetrics	0	1	1	2		1	4	2	50	8	1	2	2	1	1	2	1	3	1	0	0	0	0	0	0	0	0	0	0	2	0	0	1	1	1	0	0	0
76	256�	1	26	3	1	4	1	2	0	(skip)	thoracic surgery	1	2	1	2		1	2	2	60	12	2	2	2	2	2	2	1	1	2	0	4	0	1	1	1	1	0	0	0	0	2	8	1	1	1	0	0	1
77	415�	1	26	3	0	5	6	2	0	(skip)	orthopedic surgery	1	2	1	2		1	2	2	84	12	3	3	3	1	1	2	1	3	2	1	13	1	2	0	0	3	2	4	2	32	14	34	3	2	3	1	3	3
78	373�	0	26	3	0	4	3	1	0	(skip)	anesthesiology	1	2	1	2		1	4	2	40	8	1	2	2	2	2	2	1	1	1	0	7	0	1	0	1	2	1	1	1	0	0	0	1	1	1	0	0	0
79	382�	1	25	2	0	4	1	1	0	(skip)	Oral Rehabilitation	1	1	3	2		1	4	1	40	8	2	2	2	3	2	2	1	1	1	1	5	0	1	1	1	1	1	0	0	0	0	2	1	1	1	0	0	0
80	235�	1	26	3	0	4	5	2	0	(skip)	orthopedic surgery	0	2	1	2		1	2	2	50	8	2	2	2	2	2	2	1	1	1	0	1	0	0	0	0	1	0	0	0	0	0	0	1	1	1	0	0	0
81	1056�	1	26	3	0	4	1	1	0	(skip)	general medicine	1	3	1	1		1	2	2	50	10	3	3	3	3	2	3	1	1	1	1	21	2	3	3	2	4	3	3	3	28	10	18	3	2	2	1	3	2
82	294�	1	26	3	0	5	1	2	0	(skip)	otolaryngology	1	2	1	2		1	2	2	60	10	2	2	2	2	1	3	1	2	1	0	3	0	0	0	1	2	0	0	0	0	0	0	1	1	1	0	0	0
83	503�	0	29	3	0	5	5	2	0	(skip)	department of gynecology and obstetrics	1	3	1	3		1	4	2	50	8	2	3	1	1	1	2	1	1	1	0	10	1	2	1	2	2	1	1	1	10	2	4	1	1	1	1	0	0
84	383�	0	25	3	0	4	5	2	0	(skip)	general medicine	1	2	1	3		1	2	2	45	8	2	2	2	2	1	2	1	1	1	0	3	0	0	1	0	2	0	0	0	0	0	0	1	1	1	0	0	0
85	322�	0	26	3	1	5	5	1	0	(skip)	anesthesiology	1	3	1	2		1	1	1	55	11	2	2	2	2	2	2	2	1	1	0	7	0	1	1	1	1	1	1	1	14	6	4	1	1	1	1	2	1
86	474�	0	26	1	0	2	5	1	0	(skip)	(sth. or sb) else	1	3	2	3		1	1	1	40	8	3	2	2	2	2	2	1	1	1	0	4	0	1	1	1	1	0	0	0	0	0	0	1	1	1	0	0	0
87	407�	1	27	2	0	5	1	1	0	(skip)	General Dentistry	1	3	3	3		1	1	1	35	7	1	2	2	2	2	2	2	2	1	0	11	1	1	1	2	3	2	1	1	12	2	8	1	1	1	1	1	1
88	405�	1	24	3	1	4	5	2	0	(skip)	critical care medicine	0	2	1	2		1	4	3	48	8	2	2	2	2	1	2	1	2	1	0	5	0	1	0	0	2	1	0	1	4	2	2	1	1	1	0	0	0
89	495�	0	27	3	0	4	5	2	0	(skip)	Radiation Oncology	1	3	1	1		1	2	2	50	8	3	3	2	2	1	2	3	2	1	0	0	0	0	0	0	0	0	0	0	14	8	8	1	1	1	1	1	1
90	350�	1	28	3	0	2	4	1	0	(skip)	orthopedic surgery	1	2	1	1		1	4	2	84	12	1	1	1	1	1	3	1	1	1	0	4	0	1	0	0	2	1	0	0	0	0	0	1	1	1	0	0	0
91	641�	0	28	3	0	2	3	2	0	(skip)	neurosurgery	1	2	1	2		1	2	2	40	8	2	2	2	2	2	2	1	2	1	0	3	0	1	0	0	1	1	0	0	0	2	0	1	1	1	0	1	0
92	365�	1	25	3	0	4	3	1	0	(skip)	orthopedic surgery	1	2	1	3		1	2	2	50	8	3	3	2	2	1	2	1	2	1	1	7	0	0	0	2	2	2	0	1	8	2	8	1	1	1	0	0	1
93	402�	0	26	2	1	5	1	1	0	(skip)	General Dentistry	1	2	3	4		1	4	1	35	7	2	2	2	2	1	2	2	1	1	0	12	1	2	1	1	3	2	2	1	18	12	14	2	2	2	1	1	1
94	609�	0	24	3	0	2	4	1	0	(skip)	general medicine	0	1	1	1		1	2	2	70	10	2	2	2	2	2	3	1	1	1	0	2	0	0	0	0	1	1	0	0	0	2	2	1	1	1	0	1	0
95	1942�	1	26	2	0	4	1	1	0	(skip)	urology	0	1	2	3		1	2	2	35	7	2	2	2	2	1	2	1	1	1	0	5	0	1	1	1	1	1	0	0	12	8	10	1	1	1	1	1	1
96	382�	1	27	3	1	2	5	2	0	(skip)	neurosurgery	1	3	1	2		1	2	2	45	9	2	2	2	2	2	2	1	1	1	0	1	0	0	0	0	1	0	0	0	0	2	0	1	1	1	0	1	0
97	395�	0	27	2	0	2	1	1	0	(skip)	radiology	1	2	2	2		0	1	1	30	6	1	1	1	1	1	2	1	1	1	0	4	0	0	0	1	1	1	1	0	0	2	0	1	1	1	0	0	0
98	408�	1	26	3	0	2	5	2	0	(skip)	radiology	1	2	1	2		1	1	1	40	8	1	1	2	1	1	1	1	2	1	0	4	0	1	0	0	1	1	0	1	0	0	0	1	1	1	0	0	0
99	622�	1	24	3	0	4	3	2	0	(skip)	radiology	0	1	1	2		1	1	1	40	8	1	1	1	1	1	2	1	1	1	0	4	0	1	1	0	1	0	0	1	0	4	2	1	1	1	0	1	0
100	570�	0	25	3	0	4	1	2	0	(skip)	department of gynecology and obstetrics	1	3	1	2		1	2	2	70	10	2	2	2	2	2	2	1	1	2	0	3	0	0	0	0	1	1	1	0	6	8	6	1	1	1	1	1	1
101	1564�	0	25	3	0	5	3	2	0	(skip)	general medicine	0	1	1	1		1	2	2	91	13	2	2	2	2	2	2	1	2	1	0	1	0	0	0	0	1	0	0	0	2	4	0	1	1	1	1	1	0
102	482�	0	25	2	0	2	1	1	0	(skip)	General Dentistry	0	1	3	3		1	4	1	35	7	2	1	2	2	1	1	1	1	1	0	5	0	1	1	0	1	1	1	0	4	2	2	1	1	1	0	0	0
103	499�	0	23	3	0	4	5	2	0	(skip)	general medicine	0	1	1	2		1	3	3	48	8	2	2	2	2	1	2	1	1	1	0	7	0	2	0	1	2	0	1	1	6	4	2	1	1	1	0	1	0
104	1098�	1	30	3	0	5	1	2	1	24	general medicine	1	2	1	3		1	2	2	44	6.3	2	2	2	2	2	2	1	1	1	0	15	2	2	3	2	3	2	1	2	16	14	6	2	2	1	1	1	1
105	733�	0	24	3	0	4	5	1	0	(skip)	general medicine	0	1	1	3		1	3	3	54	9	2	2	2	2	1	2	1	2	1	0	6	0	1	1	1	1	0	1	1	0	2	4	1	1	1	0	1	0
106	1035�	0	30	2	0	1	1	1	0	(skip)	General Dentistry	1	2	1	3		1	1	1	40	8	1	1	1	1	1	2	1	1	1	0	15	2	2	3	4	2	1	1	2	8	6	2	1	1	1	1	2	0
107	341�	1	25	3	0	4	5	2	0	(skip)	orthopedic surgery	1	2	1	3		1	2	2	50	10	3	2	1	1	1	2	2	2	1	0	7	0	1	1	2	1	1	0	1	0	0	0	1	1	1	0	0	0
108	520�	0	27	2	0	4	2	1	0	(skip)	radiology	1	3	3	3		0	1	1	40	8	1	1	1	1	1	1	1	2	1	0	1	0	0	0	0	1	0	0	0	0	0	0	1	1	1	0	0	0
109	274�	1	25	3	0	5	6	1	1	10	neurosurgery	0	1	1	5		1	4	4	45	9	3	3	3	3	1	3	1	1	1	0	3	0	0	0	1	1	1	0	0	0	2	0	1	1	1	0	1	0
110	332�	0	24	3	0	4	5	1	0	(skip)	general medicine	1	3	1	3		1	2	2	45	9	2	2	2	2	2	2	1	2	1	0	2	0	1	0	0	1	0	0	0	0	0	2	1	1	1	0	0	1
111	669�	0	29	3	0	2	5	1	0	(skip)	anesthesiology	1	3	1	2		1	2	2	60	10	2	2	2	1	1	2	1	2	1	0	5	0	0	0	1	1	2	0	1	0	0	2	1	1	1	0	0	0
112	362�	1	27	3	0	5	5	1	0	(skip)	neurosurgery	1	2	1	5		0	4	4	60	12	3	3	3	3	2	3	3	3	2	1	22	3	4	2	3	4	3	3	3	22	22	24	2	3	3	2	2	2
113	289�	0	27	1	0	2	1	1	1	12	ophthalmologic	1	2	2	4		1	2	2	56	8	2	2	2	2	2	2	2	2	1	0	0	0	0	0	0	0	0	0	0	8	8	6	1	1	1	1	1	1
114	272�	0	24	3	1	5	3	1	0	(skip)	(sth. or sb) else	1	2	1	2		1	2	2	45	8	2	2	1	1	1	2	2	1	1	0	0	0	0	0	0	0	0	0	0	2	4	0	1	1	1	0	1	0
115	561�	0	26	2	0	2	1	1	0	(skip)	anesthesiology	0	2	2	2		1	1	1	60	12	1	1	2	1	1	2	1	1	1	0	11	1	1	2	3	2	1	1	1	4	4	4	1	1	1	0	0	0
116	447�	0	24	3	0	5	1	1	0	(skip)	department of gynecology and obstetrics	0	1	1	2		1	2	2	60	11	2	2	2	2	1	3	1	1	1	0	11	1	1	2	3	1	2	1	1	4	6	2	1	1	1	1	0	0
117	725�	0	24	3	0	4	6	1	0	(skip)	anesthesiology	0	1	1	2		1	4	1	56	11	2	3	2	2	2	3	2	1	1	0	4	0	0	0	1	1	1	0	1	8	4	8	1	1	1	1	1	1
118	217�	1	26	3	0	5	5	2	0	(skip)	anesthesiology	1	3	1	1		1	3	3	100	14	2	1	1	1	1	1	1	1	2	1	0	0	0	0	0	0	0	0	0	0	0	0	1	1	1	0	0	0
119	461�	1	28	2	0	5	4	1	1	2019.3	psychiatry	1	3	3	2		1	4	2	40	8	2	2	2	2	1	2	1	1	1	0	2	0	0	0	1	1	0	0	0	8	2	2	1	1	1	1	0	1
120	971�	1	27	2	0	4	1	1	0	(skip)	emergency department	1	3	1	2		1	3	3	60		2	2	1	1	1	2	1	1	1	0	21	2	4	2	3	4	3	3	2	18	8	14	2	1	2	1	1	1
121	560�	1	23	3	1	5	5	1	0	(skip)	critical care medicine	0	1	1	2		1	4	2	56	8	2	3	2	2	2	3	1	1	1	0	2	0	0	0	1	1	0	0	0	0	0	0	1	1	1	0	0	0
122	261�	0	26	3	0	2	2	2	0	(skip)	general medicine	1	2	1	2		1	4	2	56	8	2	2	2	2	2	2	1	1	1	0	7	0	1	1	1	1	1	1	1	0	0	0	1	1	1	0	0	0
123	410�	0	26	3	1	4	6	1	0	(skip)	anesthesiology	1	2	1	3		1	1	1	65	13	2	3	2	2	1	3	1	1	1	0	6	0	0	0	2	2	2	0	0	0	6	4	1	1	1	0	1	1
124	816�	1	26	3	1	2	4	1	0	(skip)	general medicine	1	3	1	2		1	1	1	50	7	3	3	3	3	2	3	2	2	1	0	13	1	2	0	2	3	2	2	2	20	18	26	2	3	3	2	2	2
125	346�	1	24	3	0	2	5	1	0	(skip)	general medicine	0	1	1	1		1	2	2	42	6	3	3	2	2	1	1	1	1	1	0	5	0	1	1	1	1	1	0	0	4	12	4	1	2	1	0	2	0
126	370�	0	28	3	1	2	5	1	1	16	neurosurgery	1	1	1	1		1	2	2	60	12	2	1	1	1	1	2	1	1	1	0	1	0	0	0	0	1	0	0	0	0	0	0	1	1	1	0	0	0
127	1507�	1	25	3	0	2	5	2	0	(skip)	general medicine	1	2	1	2		1	3	3	70	10	2	2	2	2	1	2	1	2	1	0	7	0	1	1	0	2	1	1	1	2	4	0	1	1	1	0	0	0
128	356�	1	25	3	0	5	1	2	0	(skip)	general medicine	1	2	1	2		1	2	2	56	8	2	3	2	2	2	3	2	1	1	0	3	0	1	0	0	1	1	0	0	8	10	6	1	2	1	1	1	1
129	429�	1	25	3	1	5	3	1	0	(skip)	orthopedic surgery	1	2	1	2		1	2	2	40	7	2	3	1	1	1	2	1	1	1	0	6	0	1	0	0	2	1	1	1	6	2	6	1	1	1	0	1	1
130	353�	1	23	3	0	5	3	1	0	(skip)	orthopedic surgery	0	2	1	5		1	3	3	100	15	2	2	2	2	1	2	1	1	1	1	1	0	0	0	0	1	0	0	0	0	0	0	1	1	1	0	0	0
131	302�	1	26	3	1	2	1	2	0	(skip)	department of gynecology and obstetrics	1	3	1	2		1	3	3	70	10	2	2	2	2	2	2	2	2	3	1	14	1	2	2	2	2	2	2	2	14	14	14	1	2	2	1	1	1
132	389�	0	24	3	1	5	4	2	0	(skip)	general medicine	1	2	1	1		1	2	2	44	6.3	2	3	3	3	2	3	2	2	1	0	10	1	2	1	1	2	1	2	1	12	6	4	1	1	1	0	1	0
133	1057�	0	28	2	0	2	5	1	1	2021.3-202	general medicine	0	1	2	3		1	2	2	70	10	2	1	1	1	1	2	1	1	1	0	14	1	2	2	2	2	2	2	2	12	10	6	1	2	1	1	1	1
134	259�	0	26	3	1	2	5	2	0	(skip)	neurosurgery	1	2	1	2		1	1	1	9	9	2	3	3	1	1	2	1	1	1	0	7	0	0	1	1	2	1	1	1	16	12	14	2	2	2	1	2	1
135	594�	0	24	3	1	2	1	1	0	(skip)	general medicine	0	1	1	2		1	2	2	37	7	3	3	2	1	1	2	1	1	1	0	9	1	1	2	1	2	1	1	1	14	10	10	1	2	1	2	1	1
136	544�	0	24	3	0	4	4	1	0	(skip)	neurosurgery	1	2	1	1		1	1	1	50	7	3	3	3	2	2	3	1	3	1	0	11	1	2	2	2	2	1	1	1	22	28	12	2	3	2	2	2	2
137	246�	1	28	3	0	6	6	2	1	时间	(sth. or sb) else	1	2	1	5		1	4	4		18	3	3	3	3	2	3	3	3	2	1	28	3	4	4	4	4	4	4	4	42	42	42	3	3	3	3	3	3
138	285�	1	26	3	0	2	3	2	0	(skip)	neurosurgery	1	3	1	1		1	4	1	40	8	1	1	1	1	1	2	1	1	1	0	0	0	0	0	0	0	0	0	0	0	0	0	1	1	1	0	0	0
139	367�	1	27	3	0	2	4	2	1	36	orthopedic surgery	0	2	3	4		1	2	2	40	8	2	2	2	2	1	2	1	1	1	1	8	1	1	1	1	2	1	1	1	10	12	8	1	2	1	1	1	1
140	315�	0	24	3	0	2	1	1	0	(skip)	radiology	1	2	1	2		0	1	1	40	8	1	1	1	1	1	2	1	1	1	0	0	0	0	0	0	0	0	0	0	0	0	0	1	1	1	0	0	0
141	548�	1	25	1	0	5	5	1	1	19	general practice	1	2	1	2		1	4	3	50	9	2	3	2	1	2	3	2	2	1	1	11	1	2	1	0	3	2	2	1	6	12	10	1	2	1	1	1	1
142	504�	1	28	3	1	4	5	1	0	(skip)	neurosurgery	1	3	1	2		1	4	2	63	9	2	2	2	2	2	2	3	3	1	0	5	0	1	0	0	2	1	0	1	14	8	8	1	1	1	1	2	1
143	437�	1	24	3	0	4	6	2	0	(skip)	radiology	0	1	1	1		1	1	1	35	7	2	2	2	2	2	2	1	1	1	0	9	1	1	1	2	2	1	1	1	12	14	10	1	2	1	1	1	1
144	258�	0	26	3	0	5	3	2	0	(skip)	department of gynecology and obstetrics	1	3	1	1		1	2	2	35	6	2	2	2	2	1	2	2	2	1	0	3	0	1	1	0	1	0	0	0	0	0	0	1	1	1	0	0	0
145	290�	0	25	3	0	2	5	1	0	(skip)	(sth. or sb) else	1	2	1	1		1	1	1	49	7	2	2	2	2	2	2	1	1	1	0	8	1	1	1	1	2	1	1	1	0	0	0	1	1	1	0	0	0
146	677�	0	25	3	0	4	5	1	0	(skip)	Radiation Oncology	0	2	1	2		1	2	2	40	8	2	2	2	2	1	2	1	2	1	0	5	0	1	1	1	1	1	0	0	6	8	4	1	1	1	1	1	0
147	390�	1	24	3	0	4	5	2	0	(skip)	general medicine	1	2	1	3		1	3	3	50	7	2	2	2	2	2	2	1	1	1	0	1	0	0	0	0	1	0	0	0	0	2	0	1	1	1	0	1	0
148	496�	1	24	3	1	5	4	1	0	(skip)	neurosurgery	1	2	1	2		1	2	2	65	9	1	1	1	1	1	1	1	1	1	0	0	0	0	0	0	0	0	0	0	0	0	0	1	1	1	0	0	0
149	722�	0	26	3	1	2	4	1	0	(skip)	anesthesiology	1	3	1	3		1	1	1	60	12	2	2	2	2	1	3	1	1	1	0	6	0	0	0	3	2	1	0	0	6	4	0	1	1	1	1	1	0
150	307�	0	25	3	0	2	1	1	0	(skip)	general medicine	1	3	1	1		1	2	2	50	8	2	3	3	1	1	3	1	1	1	0	14	1	1	2	2	2	3	2	2	0	4	6	1	1	1	0	1	1
151	633�	0	25	1	0	2	1	1	0	(skip)	Radiation Oncology	1	2	2	2		1	2	2	49	7	2	2	2	2	1	2	1	1	1	0	9	1	1	2	1	1	2	1	1	2	6	0	1	1	1	0	2	0
152	223�	1	23	3	0	4	1	1	0	(skip)	general medicine	0	1	1	1		1	4	2	60	9	2	1	1	1	1	2	1	1	1	0	1	0	0	0	0	1	0	0	0	0	2	0	1	1	1	0	0	0
153	196�	0	26	3	0	5	5	2	0	(skip)	general medicine	0	1	1	1		1	4	1	60	10	2	1	1	1	1	2	1	2	1	0	2	0	1	1	0	0	0	0	0	4	0	0	1	1	1	1	0	0
154	576�	0	27	3	0	2	5	1	0	(skip)	general medicine	1	3	1	2		1	4	2	50	9	1	2	1	1	1	2	1	1	1	0	5	0	1	0	0	2	1	1	0	8	0	0	1	1	1	1	0	0
155	958�	0	25	3	0	5	3	1	0	(skip)	department of gynecology and obstetrics	1	2	1	2		1	4	2	75	13	3	3	3	3	3	3	3	3	1	0	5	0	0	0	0	2	1	1	1	8	4	10	1	1	1	0	2	2
156	524�	0	26	3	0	5	1	2	0	(skip)	ultrasound department	1	2	1	2		1	1	2	24	8	1	1	1	1	1	1	1	1	1	0	0	0	0	0	0	0	0	0	0	2	0	0	1	1	1	0	0	0
157	468�	1	24	3	0	5	3	2	0	(skip)	orthopedic surgery	1	2	1	2		1	4	2	60	8.5	2	3	2	1	1	2	1	1	1	0	2	0	0	0	0	2	0	0	0	4	6	2	1	1	1	1	1	0
158	599�	1	30	2	0	2	4	1	1	2	neurosurgery	0	1	2	2		1	2	2	54	9	2	2	2	2	2	2	1	1	1	0	2	0	1	0	0	1	0	0	0	2	0	0	1	1	1	0	0	0
159	456�	1	25	3	1	5	2	1	0	(skip)	orthopedic surgery	1	2	1	2		1	1	1	60	10	3	3	3	1	2	3	3	3	2	1	4	0	1	1	1	0	1	0	0	8	0	2	1	1	1	0	0	0
160	476�	1	23	3	0	2	5	2	0	(skip)	orthopedic surgery	1	1	1	3		1	3	3	100	14	2	3	3	1	2	3	3	3	3	1	18	2	3	3	3	3	2	2	2	14	14	14	1	2	2	1	1	1
161	450�	0	26	3	0	2	1	2	0	(skip)	Clinical Pathology	1	3	1	2		0	1	2	50	10	1	2	2	2	1	2	2	1	1	0	7	0	1	1	1	1	1	1	1	6	6	0	1	1	1	0	0	0
162	211�	0	29	3	0	5	1	1	0	(skip)	general medicine	1	3	1	1		1	2	2	40	8	1	1	1	1	1	1	1	1	1	0	0	0	0	0	0	0	0	0	0	0	0	0	1	1	1	0	0	0
163	1366�	0	25	3	0	5	5	1	0	(skip)	general medicine	1	2	1	2		1	2	2	60	10	2	2	2	2	1	2	1	1	1	0	2	0	0	0	0	1	1	0	0	4	2	12	1	1	2	0	0	1
164	610�	0	27	2	0	4	1	1	0	(skip)	General Dentistry	0	2	3	2		1	1	1	35	7	1	1	1	1	1	2	1	1	1	0	1	0	0	0	0	1	0	0	0	2	4	4	1	1	1	0	1	0
165	228�	0	24	3	1	4	5	1	0	(skip)	Clinical Pathology	0	2	1	3		0	1	1	60	12	3	3	1	1	1	3	1	1	1	0	0	0	0	0	0	0	0	0	0	0	0	0	1	1	1	0	0	0
166	711�	1	26	3	1	2	4	1	0	(skip)	general medicine	0	2	1	3		1	3	3	55	10	2	2	2	2	1	2	2	1	1	0	15	2	3	3	0	3	3	1	2	12	12	10	1	2	1	1	2	1
167	1605�	0	28	3	0	4	5	1	0	(skip)	neurosurgery	1	2	1	2		1	2	2	45	9	2	2	2	2	1	2	1	1	1	0	8	1	2	0	0	2	1	2	1	0	0	0	1	1	1	0	0	0
168	470�	1	25	3	0	5	5	1	0	(skip)	psychiatry	1	2	1	3		1	2	2	60	11	3	3	3	1	1	3	1	2	1	0	8	1	1	1	1	2	1	1	1	14	14	14	1	2	2	1	1	1
169	217�	0	25	3	0	4	1	1	0	(skip)	neurosurgery	0	1	1	2		1	1	1	70	10	1	1	1	1	1	2	1	1	1	0	3	0	2	0	1	0	0	0	0	2	8	4	1	1	1	1	3	1
170	346�	1	27	3	1	4	1	2	0	(skip)	general medicine	1	3	1	3		0	1	1	30	4	2	2	1	1	1	1	1	1	1	0	1	0	0	0	0	1	0	0	0	0	4	2	1	1	1	0	0	0
171	576�	0	24	3	0	2	4	2	0	(skip)	Clinical Pathology	1	2	1	3		0	1	2	45	8	2	2	2	2	2	2	2	1	1	1	5	0	1	0	1	1	1	1	0	14	8	6	1	1	1	1	1	1
172	411�	0	25	3	0	5	5	1	0	(skip)	critical care medicine	1	2	1	2		1	2	2	60	8	2	2	2	2	1	2	1	1	1	0	11	1	2	1	1	2	2	1	2	2	2	2	1	1	1	1	1	1
173	2809�	0	26	2	0	5	1	1	0	(skip)	general medicine	0	1	2	1		1	2	2	40	8	1	1	1	1	1	2	1	1	1	0	0	0	0	0	0	0	0	0	0	0	0	0	1	1	1	0	0	0
174	445�	0	24	3	1	4	5	1	0	(skip)	critical care medicine	1	2	1	2		1	2	2	44	8	2	2	2	1	1	2	1	2	1	0	1	0	0	0	0	1	0	0	0	4	4	2	1	1	1	0	0	0
175	624�	0	25	3	0	5	5	1	0	(skip)	general medicine	0	1	1	3		1	2	2	48	9	2	2	2	2	1	3	1	1	1	0	8	1	1	1	1	2	1	1	1	14	4	4	1	1	1	1	1	0
176	542�	0	24	3	0	4	5	1	0	(skip)	critical care medicine	1	2	1	2		1	2	2	44	8	2	2	2	1	1	2	1	2	1	0	1	0	0	0	0	1	0	0	0	0	0	0	1	1	1	0	0	0
177	565�	0	26	2	1	4	1	1	0	(skip)	Skin and Sexually Transmitted Diseases	0	2	2	2		1	2	2	40	8	2	2	2	2	1	2	1	2	1	0	3	0	1	0	1	1	0	0	0	10	2	8	1	1	1	0	0	1
178	387�	0	26	3	0	4	2	1	0	(skip)	radiology	1	2	1	2		0	1	1	40	8	2	2	2	1	1	2	1	1	1	0	1	0	0	0	0	1	0	0	0	6	0	4	1	1	1	0	0	1
179	3813�	0	25	2	0	5	1	1	0	(skip)	otolaryngology	0	2	2	2		1	2	2	56	11	2	1	1	1	1	2	1	2	1	0	3	0	0	0	0	2	1	0	0	6	10	6	1	2	1	0	2	0
180	2796�	0	24	3	1	2	3	1	0	(skip)	anesthesiology	0	1	1	2		1	2	2	70	10	2	2	2	2	1	2	1	1	1	0	1	0	0	0	0	1	0	0	0	0	4	0	1	1	1	0	1	0
181	1003�	0	25	3	1	4	5	2	0	(skip)	neurosurgery	1	2	1	2		1	1	1	35	8	2	2	2	2	1	2	1	1	1	0	4	0	0	1	1	1	0	0	1	12	12	16	1	2	2	0	0	2
182	553�	0	25	3	0	2	1	1	0	(skip)	ultrasound department	1	2	1	2		1	2	2	40	8	2	2	2	1	1	2	1	1	1	0	7	0	1	1	0	2	2	0	1	8	4	14	1	1	2	1	1	2
183	611�	0	25	3	1	4	2	2	0	(skip)	psychiatry	1	2	1	1		1	4	2	60	8	3	3	3	1	1	2	1	1	1	1	9	1	1	1	1	2	2	0	2	14	8	16	1	1	2	1	0	2
184	474�	1	23	3	0	2	6	1	0	(skip)	general medicine	0	1	1	3		1	4	1	60	10	3	3	3	3	1	3	2	2	1	1	11	1	2	2	2	2	1	1	1	22	16	28	2	3	3	1	1	1
185	996�	0	25	3	0	4	6	2	0	(skip)	department of gynecology and obstetrics	1	2	1	2		1	4	2	81	12	2	3	3	2	1	3	2	1	1	0	3	0	0	0	1	1	0	1	0	4	4	0	1	1	1	0	1	0
186	704�	0	23	3	1	4	4	2	0	(skip)	anesthesiology	0	1	1	2		1	4	1	60	12	2	2	2	2	2	2	1	1	1	0	2	0	0	0	0	2	0	0	0	2	2	2	1	1	1	0	0	0
187	605�	0	27	3	0	5	4	1	0	(skip)	ultrasound department	1	2	1	3		1	1	2	56	8	3	3	2	2	2	2	1	1	1	1	5	0	0	0	0	2	1	1	1	6	6	6	1	1	1	0	1	1
188	292�	1	25	3	0	2	2	1	0	(skip)	department of gynecology and obstetrics	0	1	1	1		0	1	2	80	12	1	1	1	1	1	1	1	1	1	0	0	0	0	0	0	0	0	0	0	0	0	0	1	1	1	0	0	0
189	866�	0	29	3	0	5	6	1	0	(skip)	department of gynecology and obstetrics	1	2	1	2		1	4	2	80	12	3	3	3	2	2	3	1	1	1	0	8	1	1	1	1	2	1	1	1	20	18	16	2	3	2	1	2	2
190	2419�	0	30	2	0	2	2	1	0	(skip)	general medicine	1	3	3	2		1	2	2	40	7	2	2	2	1	1	2	1	1	1	0	1	0	0	0	1	0	0	0	0	0	0	0	1	1	1	0	0	0
191	291�	0	25	3	0	4	5	1	0	(skip)	neurosurgery	0	2	1	2		1	2	2	48	9	2	2	2	2	1	2	1	2	1	0	4	0	1	0	1	1	1	0	0	0	14	2	1	2	1	0	2	0
192	2271�	0	23	3	0	5	1	2	0	(skip)	general medicine	0	1	1	2		1	4	2	45	9	3	2	2	2	2	3	2	2	1	0	7	0	1	1	0	2	1	1	1	8	8	2	1	1	1	1	0	0
193	301�	1	25	3	1	5	5	2	0	(skip)	orthopedic surgery	0	2	1	1		1	2	2	56	8	2	2	1	1	1	3	1	1	1	0	7	0	1	0	0	1	3	0	2	22	20	22	2	3	3	1	2	2
194	556�	0	25	1	0	2	1	1	0	(skip)	general practice	1	2	2	2		1	2	2	48	8	1	2	2	2	2	2	1	1	1	0	1	0	0	0	0	1	0	0	0	16	12	2	2	2	1	1	2	0
195	217�	1	26	3	1	2	1	1	0	(skip)	general medicine	1	3	1	2		1	2	2	40	7	1	2	2	2	1	1	1	2	1	0	1	0	0	0	0	1	0	0	0	0	0	0	1	1	1	0	0	0
196	696�	0	27	3	0	5	6	1	0	(skip)	department of gynecology and obstetrics	1	2	1	2		1	4	2	64	12	2	2	2	2	2	3	1	1	1	0	9	1	1	1	2	2	1	1	1	6	10	2	1	2	1	1	2	0
197	423�	0	25	3	0	4	5	1	0	(skip)	general medicine	1	2	1	2		1	4	2	40	8	2	2	2	2	2	2	2	1	1	0	13	1	2	2	2	2	2	2	1	12	12	4	1	2	1	1	1	1
198	361�	0	24	3	1	5	1	1	0	(skip)	Skin and Sexually Transmitted Diseases	0	1	1	2		1	4	2	49	7	2	2	2	2	2	2	1	1	1	0	8	1	1	1	2	1	1	1	1	12	12	4	1	2	1	0	1	0
199	445�	0	25	3	0	4	6	2	0	(skip)	neurosurgery	1	3	1	2		1	1	1	50	10	2	2	2	2	2	1	1	1	1	0	1	0	1	0	0	0	0	0	0	0	2	0	1	1	1	0	0	0
200	325�	1	25	3	0	2	1	2	0	(skip)	general medicine	1	2	1	1		1	2	2	50	10	2	2	2	2	2	2	1	1	1	0	2	0	0	0	1	1	0	0	0	0	0	0	1	1	1	0	0	0
201	441�	0	25	3	0	4	5	1	0	(skip)	general medicine	1	2	1	1		0	2	2	40	8	1	1	1	1	1	2	1	1	1	0	1	0	0	0	0	1	0	0	0	0	0	0	1	1	1	0	0	0
202	729�	0	24	3	1	2	2	1	0	(skip)	neurosurgery	1	2	1	4		1	4	2	60	12	2	2	2	2	2	3	1	1	1	0	2	0	0	0	1	1	0	0	0	12	8	8	1	1	1	0	1	1
203	468�	1	26	3	0	5	5	1	0	(skip)	general medicine	1	2	1	3		1	2	2	40	6	3	2	2	2	1	2	1	1	1	1	0	0	0	0	0	0	0	0	0	8	2	18	1	1	2	0	0	2
204	191�	1	24	3	0	5	5	2	0	(skip)	general medicine	1	2	1	2		1	2	2	50	8	3	3	2	2	2	2	1	1	1	0	0	0	0	0	0	0	0	0	0	0	2	0	1	1	1	0	0	0
205	950�	1	25	3	0	5	5	2	0	(skip)	orthopedic surgery	1	2	1	2		1	2	2	84	12	2	2	3	2	1	3	1	1	1	0	20	2	2	2	4	4	4	2	2	10	2	4	1	1	1	1	1	0
206	728�	0	27	3	0	4	5	1	0	(skip)	department of gynecology and obstetrics	1	2	1	2		1	1	1	63	9	3	3	3	3	2	3	2	1	1	0	0	0	0	0	0	0	0	0	0	6	4	2	1	1	1	0	0	0
207	371�	0	24	3	1	5	5	1	0	(skip)	general medicine	1	2	1	2		1	4	2	40	8	3	3	2	2	2	2	2	2	1	0	3	0	1	0	0	1	1	0	0	12	0	6	1	1	1	0	0	1
208	1323�	0	26	3	0	2	1	1	0	(skip)	Skin and Sexually Transmitted Diseases	1	2	1	1		1	2	2	50	8	2	2	2	2	1	2	1	2	1	0	4	0	0	0	1	1	1	0	1	0	2	2	1	1	1	0	1	0
209	510�	0	24	3	0	4	5	1	0	(skip)	general medicine	1	2	1	2		1	4	2	60	10	3	2	2	2	2	2	1	1	1	0	3	0	0	1	0	1	1	0	0	10	4	2	1	1	1	1	1	0
210	358�	0	26	2	0	4	1	1	0	(skip)	radiology	1	2	2	2		0	1	1	40	8	2	2	1	2	1	2	1	1	1	0	2	0	0	0	1	1	0	0	0	2	2	2	1	1	1	0	1	0
211	331�	0	24	3	0	2	1	1	0	(skip)	general medicine	1	2	1	2		1	4	2	56	10	2	2	2	2	2	2	1	2	1	0	7	0	1	1	1	1	1	1	1	0	0	0	1	1	1	0	0	0
212	449�	0	26	3	0	4	3	1	0	(skip)	general medicine	1	3	1	2		1	2	2	45	10	2	2	2	2	2	3	1	2	1	0	3	0	0	0	0	2	0	0	1	10	10	6	1	2	1	1	0	1
213	266�	1	24	3	1	4	1	1	0	(skip)	thoracic surgery	0	1	1	1		1	1	2	36	6	1	1	1	1	1	3	1	1	1	0	0	0	0	0	0	0	0	0	0	0	0	0	1	1	1	0	0	0
214	333�	1	26	3	1	5	1	1	0	(skip)	anesthesiology	1	3	1	2		1	1	1	40	8	2	2	1	1	1	2	2	2	1	0	5	0	0	0	1	2	1	1	0	0	0	0	1	1	1	0	0	0
215	426�	1	24	3	0	2	1	2	0	(skip)	neurosurgery	0	1	1	2		1	2	2	50	9	3	2	2	2	1	2	1	3	1	0	9	1	1	1	2	2	1	1	1	0	2	2	1	1	1	0	1	0
216	359�	0	26	3	0	4	1	2	0	(skip)	department of gynecology and obstetrics	1	2	1	1		1	4	2	70	12	2	2	2	2	1	2	1	1	1	0	2	0	0	0	0	1	0	1	0	0	2	0	1	1	1	0	0	0
217	612�	0	30	1	0	1	5	2	0	(skip)	Skin and Sexually Transmitted Diseases	1	3	2	4		1	2	2	45	8	2	2	2	2	2	2	1	1	1	0	9	1	2	2	0	2	1	1	1	2	0	2	1	1	1	0	0	1
218	589�	0	26	3	0	2	5	1	0	(skip)	Skin and Sexually Transmitted Diseases	1	2	1	1		1	2	2	70	10	2	2	2	1	1	2	1	1	1	0	1	0	0	0	0	1	0	0	0	2	0	0	1	1	1	0	0	0
219	928�	0	24	3	0	2	5	1	0	(skip)	general medicine	1	2	1	1		1	2	2	60	10	2	3	2	2	2	2	1	1	1	0	10	1	1	2	2	2	1	1	1	12	6	12	1	1	2	2	0	1
220	638�	1	27	1	1	5	4	1	1	24个月	ultrasound department	1	2	2	3		1	1	2	32	8	2	3	2	1	1	2	1	2	2	0	6	0	1	1	1	1	1	1	0	10	4	12	1	1	2	1	1	1
221	6471�	1	26	3	1	2	1	2	0	(skip)	thoracic surgery	1	3	1	2		1	1	1	35	7	1	1	1	1	1	2	1	1	1	0	4	0	0	0	1	1	1	0	1	0	2	0	1	1	1	0	0	0
222	670�	1	25	3	0	5	5	2	0	(skip)	general medicine	1	2	1	2		1	1	1	40	8	2	2	2	2	1	2	2	2	1	1	3	0	0	0	1	1	1	0	0	6	2	6	1	1	1	0	0	1
223	696�	1	26	3	0	4	1	2	0	(skip)	orthopedic surgery	1	3	1	2		1	4	2	60	8.5	3	3	2	2	2	3	2	3	1	1	11	1	2	1	2	2	2	1	1	14	4	8	1	1	1	1	1	1
224	439�	0	34	3	0	4	1	1	0	(skip)	department of gynecology and obstetrics	0	1	1	2		1	2	2	65	12	3	3	3	3	3	3	1	1	1	0	3	0	0	1	1	1	0	0	0	16	14	16	2	2	2	1	2	2
225	256�	0	26	3	0	2	1	2	0	(skip)	general medicine	1	3	1	3		1	1	2	50	9	2	2	2	2	2	3	1	2	1	0	7	0	0	1	2	1	1	1	1	12	10	10	1	2	1	2	1	1
226	406�	0	28	3	1	5	5	1	0	(skip)	general medicine	1	2	1	2		1	3	2	53	9	2	2	2	2	1	2	1	1	1	0	8	1	1	1	2	2	1	1	0	2	0	0	1	1	1	0	0	0
227	608�	1	24	3	0	1	4	2	0	(skip)	Department of Rehabilitation Medicine	1	2	1	2		1	4	2	70	10	2	3	3	2	1	3	1	2	2	1	12	1	2	1	1	2	2	2	2	22	12	26	2	2	3	1	1	2
228	1237�	0	24	3	0	4	1	2	0	(skip)	general medicine	0	1	1	2		1	2	2	60	8	3	3	3	2	1	3	1	1	1	0	4	0	0	1	1	1	1	0	0	6	6	4	1	1	1	0	0	0
229	285�	1	32	4	1	1	1	2	1	2019.8	Clinical Pathology	1	2	1	2		0	1	1	4E-44		1	1	1	1	1	2	1	1	1	1	10	1	2	1	2	2	1	1	1	4	4	6	1	1	1	0	1	0
230	770�	0	27	3	1	2	2	2	0	(skip)	oral and maxillofacial surgery	1	3	1	2		1	4	1	30	6	1	2	2	2	2	2	1	1	1	0	0	0	0	0	0	0	0	0	0	0	0	0	1	1	1	0	0	0
231	395�	1	26	3	1	2	4	2	0	(skip)	general medicine	1	2	1	3		1	4	2	7	8	2	2	1	1	1	2	1	1	1	0	4	0	1	0	1	2	0	0	0	0	0	0	1	1	1	0	0	0
232	268�	0	25	3	0	5	5	1	0	(skip)	otolaryngology	1	2	1	2		1	2	2	50	8	2	2	2	2	2	2	1	1	1	0	8	1	1	2	1	1	1	1	1	0	0	0	1	1	1	0	0	0
233	5508�	1	26	3	0	4	5	2	0	(skip)	anesthesiology	1	3	1	2		1	4	1	50	10	3	3	2	2	2	3	1	1	1	1	4	0	1	0	0	2	1	0	0	12	6	8	1	1	1	1	0	1
234	220�	0	26	3	0	2	3	2	0	(skip)	(sth. or sb) else	1	3	1	2		1	1	1	48	8	2	2	2	2	2	2	1	2	1	0	11	1	1	2	2	2	1	1	2	2	2	4	1	1	1	0	0	1
235	1030�	1	27	3	1	2	1	1	0	(skip)	emergency department	1	3	1	1		1	4	4	60	9	3	2	2	2	2	2	1	1	1	0	9	1	1	1	1	2	2	1	1	14	14	10	1	2	1	1	1	1
236	438�	0	25	3	0	4	3	1	0	(skip)	general medicine	1	2	1	2		1	2	2	50	8	3	3	3	2	1	2	1	1	1	0	5	0	2	0	0	2	0	0	1	2	10	4	1	2	1	1	1	0
237	555�	0	24	3	1	5	2	2	0	(skip)	ultrasound department	1	2	1	2		1	1	2	36	6	1	2	2	1	1	3	1	1	1	0	1	0	0	0	0	1	0	0	0	4	4	2	1	1	1	0	1	0
238	291�	0	25	3	0	2	6	1	0	(skip)	general medicine	0	1	1	1		1	1	1	54	9	2	2	2	2	2	2	1	2	1	0	5	0	1	0	1	1	2	0	0	2	0	0	1	1	1	0	0	0
239	309�	0	24	1	0	2	1	1	0	(skip)	general medicine	0	1	1	2		1	1	1	45	8	1	1	1	1	1	1	1	1	1	0	0	0	0	0	0	0	0	0	0	0	0	0	1	1	1	0	0	0
240	275�	1	26	3	1	5	5	2	0	(skip)	Clinical Pathology	0	2	1	2		0	1	1	60	10	3	3	3	3	1	3	3	1	1	0	9	1	2	1	1	2	2	0	1	10	0	8	1	1	1	1	0	0
241	267�	1	25	3	0	2	1	1	0	(skip)	general medicine	0	1	1	1		1	2	2	65	7	2	2	2	2	1	2	1	2	1	0	1	0	0	0	0	1	0	0	0	2	4	2	1	1	1	0	0	0
242	674�	0	24	3	0	5	4	1	0	(skip)	general medicine	1	2	1	2		1	2	2	50	8	3	3	2	1	1	1	1	1	1	1	0	0	0	0	0	0	0	0	0	6	4	4	1	1	1	0	0	0
243	1546�	1	25	3	0	4	3	2	0	(skip)	orthopedic surgery	1	2	1	2		1	2	2	50	10	2	2	2	2	1	2	1	1	1	0	1	0	0	0	0	1	0	0	0	0	0	0	1	1	1	0	0	0
244	912�	1	26	3	1	4	1	1	0	(skip)	orthopedic surgery	0	1	1	2		1	2	2	50	8	2	2	2	2	2	2	1	1	1	1	6	0	0	0	1	2	1	1	1	10	12	8	1	2	1	1	1	1
245	435�	1	23	3	1	4	1	1	0	(skip)	general medicine	0	1	1	2		1	3	3	88.4	12.63	3	3	2	2	1	2	2	2	1	0	12	1	1	1	2	3	2	2	1	8	6	2	1	1	1	1	1	0
246	1125�	1	24	3	0	2	1	2	0	(skip)	neurosurgery	1	2	1	1		1	2	2	54	8	2	2	2	1	1	2	1	2	1	0	1	0	0	0	0	1	0	0	0	2	2	0	1	1	1	1	1	0
247	681�	0	26	3	0	5	5	2	0	(skip)	general medicine	1	2	1	3		1	2	2	56	8	2	3	3	2	1	2	1	2	1	0	12	1	3	1	1	3	2	1	1	10	6	4	1	1	1	1	1	0
248	1047�	0	23	3	0	5	1	1	0	(skip)	orthopedic surgery	0	1	1	1		1	4	2	99	9	3	3	3	3	2	2	1	1	1	0	6	0	1	1	1	1	1	0	1	14	2	10	1	1	1	1	0	0
249	328�	0	25	3	0	4	5	2	0	(skip)	anesthesiology	1	2	1	2		1	4	1	60	10	1	1	1	1	1	1	1	1	1	0	5	0	1	1	1	1	1	0	0	0	0	0	1	1	1	0	0	0
250	780�	1	25	3	1	5	4	1	0	(skip)	orthopedic surgery	0	2	1	3		1	2	2	60	10	3	3	2	2	2	2	1	3	2	1	1	0	0	0	0	1	0	0	0	28	12	14	3	2	2	3	1	1
251	360�	0	25	3	0	5	3	2	0	(skip)	neurosurgery	1	2	1	2		1	3	3	68	8	2	2	2	2	2	3	2	1	1	0	9	1	2	0	1	2	2	0	2	10	10	6	1	2	1	1	2	1
252	2871�	0	25	3	0	4	5	2	1	2022-08-01	neurosurgery	1	1	1	2		1	2	2	4.8E-49		2	2	2	1	1	2	1	1	1	0	6	0	1	0	0	2	1	1	1	14	10	6	1	2	1	1	2	1
253	384�	1	25	3	1	4	3	1	0	(skip)	orthopedic surgery	1	2	1	2		1	2	2	65	12	2	2	2	2	1	3	1	1	1	1	12	1	3	1	0	3	2	2	1	12	4	2	1	1	1	0	1	1
254	302�	1	27	3	0	5	1	1	0	(skip)	neurosurgery	1	3	1	2		1	4	2	40	8	1	2	1	1	1	2	1	1	1	0	5	0	1	0	0	1	1	1	1	0	0	0	1	1	1	0	0	0
255	318�	0	24	3	0	2	3	2	0	(skip)	general medicine	1	2	1	2		1	4	2	50	8	2	2	2	2	1	2	1	2	1	0	10	1	2	1	1	3	1	1	1	0	2	0	1	1	1	0	0	0
256	423�	0	24	3	0	5	5	1	0	(skip)	ultrasound department	1	2	1	2		1	1	2	25	5	1	1	1	1	1	1	1	1	1	0	3	0	1	0	0	1	1	0	0	2	0	0	1	1	1	0	0	0
257	333�	1	25	3	0	4	5	1	0	(skip)	orthopedic surgery	1	2	1	2		1	2	2	70	10	3	3	2	2	2	3	1	1	1	1	11	1	1	2	1	2	2	1	2	28	26	22	3	3	3	2	2	1
258	336�	0	24	3	0	5	5	1	0	(skip)	neurosurgery	1	2	1	2		1	4	2	48	8	2	2	2	2	2	3	1	1	1	0	9	1	2	1	1	2	1	1	1	10	6	4	1	1	1	1	1	0
259	342�	0	24	3	0	2	3	2	0	(skip)	neurosurgery	1	2	1	2		1	2	2	48	8	2	2	2	2	2	2	1	1	1	0	2	0	0	0	0	1	1	0	0	0	2	2	1	1	1	0	1	0
260	1059�	1	25	3	1	4	3	2	0	(skip)	anesthesiology	0	2	1	1		1	4	2	50	10	3	2	2	2	2	2	1	2	1	0	1	0	0	0	0	1	0	0	0	2	0	0	1	1	1	1	0	0
261	193�	1	25	3	0	2	1	2	0	(skip)	orthopedic surgery	0	2	1	1		1	2	2	56	8	3	3	3	1	1	2	1	3	1	0	6	0	0	0	0	1	2	2	1	42	42	34	3	3	3	3	3	3
262	487�	0	24	3	0	2	5	1	0	(skip)	general medicine	1	2	1	2		1	2	2	48	8	1	1	1	1	1	2	1	1	1	0	5	0	0	0	1	1	1	1	1	0	0	0	1	1	1	0	0	0
263	640�	0	33	2	0	1	2	1	1	2016.11	General Dentistry	1	3	3	4		0	4	1	30	6	1	1	1	1	1	1	1	1	1	0	2	0	0	0	0	0	0	1	1	0	2	0	1	1	1	0	1	0
264	528�	1	27	3	0	2	1	1	0	(skip)	general medicine	1	2	1	3		1	4	3	60	10	2	2	2	2	2	2	1	2	1	0	3	0	0	1	1	1	0	0	0	0	2	6	1	1	1	0	1	0
265	602�	0	25	1	0	2	1	1	1	16	Skin and Sexually Transmitted Diseases	1	2	1	2		0	1	1	35	5	1	2	1	1	1	2	1	1	1	0	7	0	1	0	1	2	1	1	1	6	4	8	1	1	1	1	1	1
266	489�	0	25	3	0	2	5	1	0	(skip)	general medicine	1	2	1	2		1	2	2	40	7	2	2	2	2	2	2	1	1	1	0	3	0	1	0	0	1	1	0	0	0	0	0	1	1	1	0	0	0
267	171�	1	24	3	1	2	5	2	0	(skip)	orthopedic surgery	1	2	1	1		1	1	1	10	10	3	3	2	2	1	3	1	2	1	0	1	0	0	0	0	1	0	0	0	0	0	0	1	1	1	0	0	0
268	316�	1	26	3	0	2	3	1	0	(skip)	orthopedic surgery	1	2	1	2		1	2	2	35	5	1	1	1	1	1	2	1	1	1	0	1	0	0	0	0	1	0	0	0	0	0	0	1	1	1	0	0	0
269	257�	0	25	3	0	4	3	2	0	(skip)	emergency department	0	2	1	2		1	3	3	50	8.5	1	1	1	1	1	2	1	1	1	0	0	0	0	0	0	0	0	0	0	0	0	0	1	1	1	0	0	0
270	243�	0	26	3	0	4	1	2	0	(skip)	neurosurgery	1	3	1	3		1	4	2	70	10	2	2	2	1	1	2	1	2	1	0	7	0	1	1	1	1	1	1	1	14	14	12	1	2	2	1	1	1
271	887�	0	25	3	0	4	5	1	0	(skip)	general medicine	1	2	1	2		1	2	2	48	8	2	2	2	2	2	3	1	2	1	0	5	0	1	0	0	1	1	1	1	8	8	2	1	1	1	1	1	0
272	485�	0	25	3	1	4	5	1	0	(skip)	general medicine	1	2	1	2		1	2	2	40	8	2	2	2	2	2	2	1	1	1	0	1	0	0	0	0	1	0	0	0	0	0	0	1	1	1	0	0	0
273	262�	1	22	3	1	6	6	2	0	(skip)	orthopedic surgery	1	2	1	1		1	2	2	50	9	2	3	2	2	2	2	1	1	1	0	6	0	1	1	1	0	1	1	1	0	2	0	1	1	1	0	1	0
274	612�	1	26	3	0	4	3	1	0	(skip)	urology	1	2	1	2		1	3	3	70	10	3	3	3	1	1	3	1	2	1	0	14	1	2	2	2	2	2	2	2	16	18	14	2	3	2	1	1	1
275	595�	0	24	1	0	2	1	1	0	(skip)	general practice	1	2	1	2		1	3	3	63	9	2	1	1	1	1	3	2	2	1	0	11	1	2	2	2	2	1	1	1	12	8	10	1	1	1	0	0	1
276	318�	1	25	3	0	5	5	2	0	(skip)	neurosurgery	1	2	1	4		1	4	2	70	10	1	1	1	1	1	3	2	2	1	1	2	0	0	0	1	1	0	0	0	2	4	0	1	1	1	0	1	0
277	332�	0	25	3	0	2	4	2	0	(skip)	Clinical Pathology	1	3	1	2		0	1	1	8	8	1	1	1	1	1	2	1	1	1	0	1	0	1	0	0	0	0	0	0	0	0	0	1	1	1	0	0	0
278	613�	1	26	3	0	2	1	1	0	(skip)	orthopedic surgery	0	2	1	2		1	3	3	72	12	2	2	2	1	1	2	1	1	1	0	1	0	0	0	0	1	0	0	0	8	0	2	1	1	1	0	0	0
279	275�	0	24	3	0	4	1	1	0	(skip)	anesthesiology	1	2	1	2		1	4	2	50	10	1	2	1	1	1	2	1	1	1	0	0	0	0	0	0	0	0	0	0	6	4	2	1	1	1	0	1	0
280	261�	1	26	3	1	4	4	1	0	(skip)	anesthesiology	1	2	1	1		1	1	2	80	12	3	3	3	1	3	3	3	3	2	1	10	1	4	0	0	2	3	1	0	16	18	18	2	3	2	0	1	1
281	319�	1	28	3	0	2	1	2	0	(skip)	orthopedic surgery	0	2	1	1		1	2	2	56	8	2	2	2	2	2	2	1	2	1	0	3	0	0	1	1	1	0	0	0	4	6	10	1	1	1	0	1	1
282	189�	1	26	3	0	4	1	1	0	(skip)	neurosurgery	1	3	1	2		1	1	2	48	9.5	1	1	1	1	1	1	1	1	1	0	0	0	0	0	0	0	0	0	0	0	0	0	1	1	1	0	0	0
283	236�	1	24	3	1	2	5	2	0	(skip)	orthopedic surgery	1	2	1	2		1	2	2	84	12	1	1	1	1	1	2	1	1	1	0	1	0	0	0	0	1	0	0	0	0	0	0	1	1	1	0	0	0
284	287�	0	26	3	0	5	3	2	0	(skip)	neurosurgery	1	2	1	2		1	2	2	56	8	1	1	1	1	1	2	1	2	1	0	3	0	1	1	0	1	0	0	0	0	0	0	1	1	1	0	0	0
285	325�	1	25	3	0	2	3	1	0	(skip)	urology	1	2	1	2		1	2	2	40	8	2	2	1	1	1	2	1	1	1	0	1	0	0	0	0	1	0	0	0	0	2	0	1	1	1	0	1	0
286	589�	0	24	3	0	4	5	1	0	(skip)	neurosurgery	1	2	1	2		1	1	1	40	9	2	2	2	2	1	3	1	2	1	0	9	1	1	0	1	2	3	1	1	14	6	8	1	1	1	1	1	1
287	442�	1	24	3	0	4	2	1	0	(skip)	general medicine	0	1	1	3		1	2	2	60	9	3	3	3	3	3	2	2	2	1	0	13	1	2	1	2	3	2	2	1	22	18	14	2	3	2	1	1	1
288	407�	1	28	3	0	2	5	2	0	(skip)	orthopedic surgery	0	2	1	2		1	2	2	52	7.5	2	2	2	2	2	2	1	1	1	0	1	0	0	0	0	1	0	0	0	0	0	0	1	1	1	0	0	0
289	502�	0	25	3	0	5	5	1	0	(skip)	general medicine	1	2	1	2		1	4	2	50	7	2	3	2	2	2	2	2	1	1	0	2	0	1	0	0	1	0	0	0	0	2	4	1	1	1	0	1	0
290	396�	0	25	3	0	4	5	1	0	(skip)	general medicine	0	2	1	2		1	2	2	48	8	3	2	2	2	2	3	1	1	1	0	1	0	0	0	0	1	0	0	0	4	2	2	1	1	1	0	0	0
291	689�	1	28	3	0	4	1	2	0	(skip)	orthopedic surgery	1	3	1	2		1	4	1	30	6	1	2	2	2	2	2	1	1	2	0	3	0	0	0	0	1	1	1	0	2	2	0	1	1	1	0	1	0
292	399�	0	24	3	0	2	5	1	0	(skip)	emergency department	0	2	1	2		1	2	2	48	8	2	2	2	2	2	2	1	1	1	0	6	0	1	0	1	1	1	1	1	8	10	4	1	2	1	0	1	1
293	516�	1	24	3	0	2	5	2	0	(skip)	general medicine	1	2	1	2		1	3	3	60	10	3	3	2	2	2	3	1	1	1	0	4	0	0	0	1	1	1	1	0	2	2	2	1	1	1	0	1	0
294	264�	1	27	1	1	5	4	2	1	12	Clinical Pathology	1	1	3	3		0	1	1	50	9.5	2	2	2	2	1	2	1	1	1	1	8	1	1	0	1	1	3	1	1	14	12	14	1	2	2	1	1	1
295	3974�	0	25	3	0	2	3	2	0	(skip)	radiology	1	2	1	2		1	4	1	66	11	2	2	2	2	2	2	1	2	1	0	4	0	1	2	0	1	0	0	0	6	2	2	1	1	1	0	1	0
296	469�	0	28	3	0	2	3	2	0	(skip)	ultrasound department	1	2	1	3		1	1	2	30	6	2	2	1	1	1	2	1	1	1	0	0	0	0	0	0	0	0	0	0	0	0	0	1	1	1	0	0	0
297	875�	0	26	2	1	4	2	1	0	(skip)	General Dentistry	1	1	2	3		1	2	2	50	8	2	1	2	2	1	2	1	1	3	0	2	0	0	0	0	1	1	0	0	6	2	2	1	1	1	0	0	0
298	435�	0	24	3	0	5	5	2	0	(skip)	department of gynecology and obstetrics	0	2	1	3		1	2	2	48	8	2	2	2	1	1	3	1	1	1	0	8	1	1	0	3	1	1	1	1	14	2	2	1	1	1	1	0	0
299	397�	0	24	3	0	4	5	2	1	2023年4�	department of gynecology and obstetrics	0	1	1	2		1	4	2	80	12	2	2	3	2	2	2	2	2	1	0	0	0	0	0	0	0	0	0	0	0	0	0	1	1	1	0	0	0
300	707�	0	27	3	0	4	3	1	0	(skip)	(sth. or sb) else	1	2	1	3		1	2	2	40	7	2	2	2	2	2	2	1	2	1	0	8	1	1	1	1	1	2	1	1	14	14	8	1	2	1	1	1	1
301	791�	0	24	3	1	4	5	1	0	(skip)	Skin and Sexually Transmitted Diseases	1	2	1	2		1	2	2	40	8	2	2	2	2	1	2	1	1	1	0	1	0	0	0	0	1	0	0	0	0	2	0	1	1	1	0	1	0
302	358�	0	25	3	0	5	1	2	0	(skip)	emergency department	0	1	1	2		1	3	4	70	10	3	3	3	3	2	3	1	1	1	0	20	2	3	2	3	3	3	3	3	28	28	28	3	3	3	2	2	2
303	734�	0	26	3	0	2	5	2	0	(skip)	anesthesiology	1	3	1	1		1	1	1	55	11	2	3	2	3	2	3	1	1	1	0	5	0	0	0	1	1	1	1	1	10	6	12	1	1	2	2	1	2
304	415�	0	23	3	0	2	1	1	0	(skip)	general medicine	0	1	1	2		1	2	2	64	9	2	2	2	2	1	2	2	2	1	0	3	0	0	0	1	1	1	0	0	0	2	0	1	1	1	0	1	0
305	316�	0	26	3	0	5	1	2	0	(skip)	otolaryngology	1	2	1	2		1	2	2	45	9	2	1	1	1	1	2	1	1	1	0	7	0	0	1	1	2	1	1	1	0	2	0	1	1	1	0	1	0
306	437�	1	27	3	1	2	1	1	0	(skip)	orthopedic surgery	1	3	1	1		1	2	2	45	8	2	2	2	2	2	3	1	1	2	0	8	1	1	1	2	2	1	0	1	12	10	0	1	2	1	0	1	0
307	358�	0	26	3	0	4	6	2	0	(skip)	department of gynecology and obstetrics	1	2	1	2		1	2	2	70	11	3	3	3	3	3	3	3	2	1	0	15	2	1	2	4	2	2	2	2	26	20	16	3	3	2	2	3	3
308	349�	0	28	3	0	5	1	2	0	(skip)	General Dentistry	1	3	1	1		1	4	2	40	10	3	2	2	2	2	3	1	2	1	0	11	1	2	2	2	1	1	2	1	14	12	4	1	2	1	1	1	1
309	507�	1	30	3	0	1	2	1	0	(skip)	general medicine	1	2	1	5		1	4	3	40	6	3	2	2	2	2	2	2	2	1	1	11	1	1	0	0	4	2	2	2	12	14	8	1	2	1	0	0	0
310	312�	0	24	3	0	2	5	1	0	(skip)	neurosurgery	1	2	1	2		1	1	1	50	9	2	2	2	2	1	2	1	1	1	0	5	0	1	1	0	2	0	0	1	0	0	0	1	1	1	0	0	0
311	268�	0	27	3	0	4	5	2	0	(skip)	general medicine	0	2	1	2		1	2	3	30	6	3	2	2	1	1	2	1	1	1	0	2	0	0	0	0	1	1	0	0	0	0	0	1	1	1	0	0	0
312	1017�	0	24	3	0	2	1	1	0	(skip)	otolaryngology	0	1	1	2		1	4	2	50	10	2	2	2	2	2	2	1	2	1	0	2	0	1	0	0	1	0	0	0	8	4	2	1	1	1	1	1	0
313	511�	1	26	1	0	2	1	1	0	(skip)	gynaecology	1	2	1	2		1	1	1	45	8	1	1	1	1	1	2	1	1	1	0	1	0	0	0	0	1	0	0	0	0	0	0	1	1	1	0	0	0
314	278�	0	26	3	0	4	5	2	0	(skip)	general medicine	1	2	1	3		1	2	2	45	8	2	2	2	2	1	2	1	1	1	0	3	0	0	0	0	1	1	0	1	2	0	0	1	1	1	0	0	0
315	722�	1	30	2	0	2	4	2	0	(skip)	orthopedic surgery	1	3	2	2		1	2	2	40	8	1	2	1	1	1	2	1	1	1	0	9	1	2	1	1	2	1	1	1	6	0	2	1	1	1	0	0	0
316	153�	1	26	3	1	2	1	2	0	(skip)	Department of Rehabilitation Medicine	1	3	1	4		1	1	2	40	8	1	2	2	2	2	2	2	1	1	0	2	0	0	0	0	0	0	1	1	0	0	0	1	1	1	0	0	0
317	252�	0	25	3	0	5	4	2	0	(skip)	department of gynecology and obstetrics	1	3	1	2		1	2	3	70	10	2	2	2	2	2	2	1	1	1	0	2	0	0	0	1	1	0	0	0	0	0	0	1	1	1	0	0	0
318	403�	1	26	3	0	5	4	1	0	(skip)	orthopedic surgery	1	3	1	2		1	2	2	40	8	3	3	3	3	3	3	3	1	1	0	9	1	2	1	0	2	2	1	1	10	4	26	1	1	3	1	2	2
319	609�	0	26	3	0	4	1	1	0	(skip)	anesthesiology	1	3	1	2		1	1	1	60	10	2	3	2	3	1	3	2	1	1	0	10	1	2	0	2	2	2	1	1	20	14	10	2	2	1	2	2	1
320	265�	0	26	3	1	2	1	2	0	(skip)	department of gynecology and obstetrics	1	3	1	1		1	2	2	50	7	2	2	2	2	2	2	1	1	1	0	2	0	0	0	0	1	1	0	0	2	2	0	1	1	1	0	1	0
321	329�	0	28	3	0	2	1	2	0	(skip)	department of gynecology and obstetrics	1	3	1	2		1	2	2	50	10	1	2	2	1	1	2	1	1	1	0	6	0	1	0	0	2	1	1	1	8	8	0	1	1	1	0	2	0
322	195�	1	26	3	0	5	1	2	0	(skip)	orthopedic surgery	1	3	1	3		1	2	2	70	12	1	1	1	1	1	3	1	1	1	0	0	0	0	0	0	0	0	0	0	0	0	0	1	1	1	0	0	0
323	220�	1	24	3	0	2	1	1	0	(skip)	general medicine	0	1	1	2		1	3	3	48	8	2	2	2	2	2	2	1	1	1	0	2	0	0	0	0	1	1	0	0	0	0	0	1	1	1	0	0	0
324	235�	1	24	3	0	4	6	1	0	(skip)	general medicine	0	1	1	1		1	2	2	84	12	2	2	2	2	2	3	1	1	1	0	8	1	2	1	1	1	1	1	1	2	2	0	1	1	1	1	1	0
325	557�	0	24	3	0	4	6	1	0	(skip)	general medicine	0	1	1	2		1	4	2	48	8	2	2	2	2	2	2	1	1	1	0	6	0	1	0	0	2	1	1	1	2	6	0	1	1	1	0	1	0
326	365�	1	24	3	0	5	1	2	0	(skip)	general medicine	0	1	1	1		1	3	3	50	9	2	2	2	2	2	3	1	1	1	0	0	0	0	0	0	0	0	0	0	0	0	0	1	1	1	0	0	0
327	457�	0	25	3	0	4	1	2	0	(skip)	department of gynecology and obstetrics	1	2	1	2		1	2	2	70	10	3	3	2	2	2	3	1	2	1	0	4	0	1	0	0	0	1	2	0	14	14	10	1	2	1	1	2	1
328	605�	0	25	3	0	2	3	2	0	(skip)	Skin and Sexually Transmitted Diseases	1	2	1	1		1	2	2	35	5	3	2	2	1	1	2	1	2	1	0	4	0	0	0	0	1	2	1	0	4	2	4	1	1	1	0	1	0
329	625�	0	24	3	1	4	1	1	0	(skip)	Clinical Pathology	1	2	1	2		0	1	4	50	9	2	2	2	2	2	3	1	1	1	0	14	1	2	2	2	2	2	2	2	12	8	8	1	1	1	1	1	1
330	297�	1	27	3	0	2	4	2	0	(skip)	general medicine	1	2	1	3		1	1	1	50	9	3	3	1	1	1	2	1	1	1	0	12	1	1	2	3	3	1	1	1	12	22	14	1	3	2	1	1	1
331	730�	0	25	3	0	4	5	1	0	(skip)	general medicine	0	2	1	2		1	4	2	45	8	3	3	3	3	3	3	1	1	1	0	9	1	2	0	0	2	2	1	2	18	14	14	2	2	2	1	0	1
332	236�	0	25	3	0	2	3	2	0	(skip)	emergency department	1	2	1	2		1	3	3	50	8	2	3	3	1	1	2	1	2	1	0	4	0	0	0	0	1	1	1	1	0	2	0	1	1	1	0	1	0
333	313�	0	24	3	0	4	6	2	0	(skip)	department of gynecology and obstetrics	1	2	1	1		1	4	2	60	8	2	2	2	2	2	3	2	2	1	1	10	1	1	1	1	2	2	2	1	16	6	4	2	1	1	0	1	1
334	437�	0	25	3	0	4	6	1	0	(skip)	department of gynecology and obstetrics	1	2	1	1		1	4	2	112	16	2	2	2	2	2	3	1	1	1	0	12	1	2	2	2	2	1	2	1	12	6	4	1	1	1	1	1	1
335	326�	0	24	3	0	4	1	1	0	(skip)	department of gynecology and obstetrics	1	2	1	2		1	4	2	70	10	2	2	2	2	2	2	2	2	1	0	9	1	2	1	1	1	2	1	1	6	6	4	1	1	1	0	1	0
336	485�	0	26	3	0	4	5	1	0	(skip)	general medicine	1	2	1	2		1	2	2	44	8	2	2	1	1	1	2	1	2	1	0	3	0	1	0	1	1	0	0	0	8	6	2	1	1	1	1	1	0
337	633�	0	25	3	0	4	5	1	0	(skip)	general medicine	1	2	1	2		1	2	2	44	8	2	3	2	2	1	2	1	2	1	0	3	0	1	0	1	1	0	0	0	10	8	8	1	1	1	0	1	1
338	373�	0	25	3	0	2	1	1	0	(skip)	department of gynecology and obstetrics	1	2	1	2		1	4	2	75	13	2	3	3	3	3	3	2	3	1	0	8	1	1	1	1	2	1	1	1	10	6	6	1	1	1	0	0	1
339	400�	1	25	3	0	2	6	2	0	(skip)	otolaryngology	1	2	1	2		1	2	2	40	8	1	1	1	1	1	1	1	1	1	0	0	0	0	0	0	0	0	0	0	0	0	0	1	1	1	0	0	0
340	210�	0	25	3	1	4	5	1	0	(skip)	Skin and Sexually Transmitted Diseases	1	2	1	2		1	2	2	40	8	2	2	2	2	2	2	2	2	1	0	0	0	0	0	0	0	0	0	0	0	0	0	1	1	1	0	0	0
341	675�	1	28	3	1	2	1	2	0	(skip)	neurosurgery	1	3	1	1		1	2	2	60	10	3	3	3	3	2	3	1	2	1	1	5	0	0	0	1	2	1	0	1	8	14	8	1	2	1	1	1	2
342	382�	0	25	3	0	2	5	1	0	(skip)	department of gynecology and obstetrics	1	2	1	2		1	2	2	75	13	1	1	1	1	1	2	1	1	1	0	3	0	0	0	0	2	0	1	0	14	10	6	1	2	1	1	2	1
343	385�	1	24	3	0	2	5	2	0	(skip)	neurosurgery	1	1	1	3		1	4	2	70	10	2	2	3	2	2	2	1	1	1	0	11	1	2	1	3	2	1	1	1	14	8	16	1	1	2	1	2	1
344	297�	0	25	3	0	4	1	1	0	(skip)	otolaryngology	1	2	1	2		1	4	2	70	10	2	2	2	2	1	2	1	3	1	0	1	0	0	0	0	1	0	0	0	4	4	0	1	1	1	0	1	0
345	526�	0	26	3	1	4	2	1	0	(skip)	general medicine	1	2	1	2		1	4	2	44	8	3	3	1	2	1	3	1	2	1	0	1	0	0	0	0	1	0	0	0	24	18	14	2	3	2	2	0	2
346	259�	0	25	3	0	5	4	1	0	(skip)	general medicine	0	1	1	3		1	2	2	55	7.8	3	2	2	2	1	3	2	3	1	0	28	3	4	4	4	4	4	4	4	32	12	38	3	2	3	3	2	3
347	1054�	0	24	3	0	4	1	1	0	(skip)	general medicine	0	1	1	2		1	4	2	60	8.5	1	2	2	1	1	2	1	1	1	0	7	0	1	1	1	1	1	1	1	2	4	0	1	1	1	0	0	0
348	586�	0	26	3	0	2	6	2	0	(skip)	general medicine	1	2	1	1		1	2	2	70	10	2	3	2	2	1	2	1	1	1	0	8	1	1	1	1	2	1	1	1	14	16	8	1	3	1	1	2	1
349	659�	0	24	3	0	4	3	1	0	(skip)	department of gynecology and obstetrics	1	2	1	1		1	4	2	56	10	2	2	1	1	1	3	1	1	1	0	5	0	1	0	1	2	0	0	1	0	2	0	1	1	1	0	1	0
350	525�	0	27	3	0	4	3	2	0	(skip)	neurosurgery	1	2	1	2		1	2	2	56	8	2	2	2	2	2	2	2	2	1	0	5	0	1	0	1	1	1	0	1	0	0	4	1	1	1	0	0	0
351	355�	0	26	3	0	5	3	1	0	(skip)	department of gynecology and obstetrics	1	2	1	2		1	3	2	50	10	3	2	2	2	2	2	1	1	1	0	2	0	0	0	1	1	0	0	0	6	6	2	1	1	1	0	2	0
352	204�	1	26	3	1	5	5	2	0	(skip)	critical care medicine	1	3	1	2		1	2	2	56	8	3	3	2	2	1	2	1	1	1	0	8	1	1	2	1	1	1	1	1	12	6	8	1	1	1	1	1	1
353	416�	0	25	3	1	2	1	1	0	(skip)	general medicine	1	3	1	2		1	3	3	60	10	2	2	2	2	2	3	2	1	1	0	9	1	1	1	1	2	2	1	1	10	8	0	1	1	1	1	2	0
354	443�	0	30	2	0	2	1	2	0	(skip)	neurosurgery	1	3	3	3		1	2	2	49	7	2	2	1	1	1	1	1	1	1	0	3	0	1	1	0	1	0	0	0	2	0	0	1	1	1	1	0	0
355	733�	1	24	3	0	4	1	2	0	(skip)	anesthesiology	0	1	1	2		1	1	1	60	8.6	2	2	2	2	2	2	1	1	1	0	2	0	1	0	0	1	0	0	0	6	6	6	1	1	1	1	1	1
356	291�	0	26	3	0	4	5	2	0	(skip)	Radiation Oncology	0	2	1	2		1	4	2	60	10	2	2	2	2	2	2	1	1	1	0	7	0	2	1	0	1	1	1	1	0	0	0	1	1	1	0	0	0
357	501�	1	26	3	0	4	5	2	0	(skip)	orthopedic surgery	1	2	1	2		1	4	2			2	2	2	2	1	3	2	2	1	0	11	1	1	2	1	2	2	2	1	12	8	12	1	1	2	1	2	1
358	517�	0	25	3	0	5	5	1	0	(skip)	general medicine	1	2	1	2		1	2	2	50	10	2	3	3	2	2	2	1	2	1	0	3	0	1	1	0	1	0	0	0	8	8	6	1	1	1	1	1	0
359	756�	0	24	3	1	4	5	2	0	(skip)	general medicine	1	2	1	1		1	2	2	50	8	2	2	2	2	2	2	2	2	1	0	5	0	1	0	0	2	1	0	1	2	4	4	1	1	1	0	1	0
360	359�	0	25	1	0	5	1	1	0	(skip)	general medicine	1	2	3	3		1	4	3	45	8	2	2	1	2	1	2	1	1	1	0	5	0	1	1	1	2	0	0	0	0	0	0	1	1	1	0	0	0
361	4025�	0	23	3	1	4	4	2	0	(skip)	otolaryngology	0	1	1	2		1	2	2	40	8	2	1	1	1	1	2	1	1	1	0	4	0	0	1	1	1	1	0	0	6	8	16	1	1	2	0	2	1
362	698�	1	25	3	1	4	5	1	0	(skip)	urology	1	2	1	3		1	2	2	35	7	3	3	2	2	1	2	1	2	1	0	8	1	1	1	1	2	1	1	1	8	4	4	1	1	1	0	1	0
363	582�	0	27	1	0	4	1	1	1	2022年2�	department of gynecology and obstetrics	0	1	2	2		1	2	2	80	12	2	1	1	1	1	2	1	1	1	0	3	0	0	1	0	1	1	0	0	6	12	0	1	2	1	1	3	0
364	319�	1	27	2	0	4	1	1	0	(skip)	neurosurgery	1	1	3	1		1	3	3	70	10	3	3	3	3	3	3	1	1	1	0	1	0	0	0	0	1	0	0	0	0	0	0	1	1	1	0	0	0
365	232�	0	23	3	0	4	4	2	0	(skip)	general medicine	0	1	1	2		1	2	2	39	7	2	2	2	2	1	2	1	1	1	0	6	0	2	0	0	1	1	1	1	2	4	2	1	1	1	0	2	0
366	406�	0	25	2	1	4	1	1	0	(skip)	general medicine	0	1	2	3		1	4	3	45	7	3	2	2	2	2	2	1	1	1	0	3	0	1	0	1	1	0	0	0	0	0	0	1	1	1	0	0	0
367	271�	1	25	3	0	5	3	2	1	69	orthopedic surgery	1	1	1	1		1	2	2	56	8	2	3	1	2	1	2	1	1	2	1	9	1	0	0	2	1	2	2	2	8	8	2	1	1	1	1	1	0
368	628�	1	26	3	0	5	5	2	0	(skip)	orthopedic surgery	1	2	1	2		1	2	2	50	9	2	2	2	2	1	2	1	1	1	0	1	0	0	0	0	1	0	0	0	0	2	0	1	1	1	0	0	0
369	428�	1	26	3	0	2	1	2	0	(skip)	urology	1	2	1	2		1	2	2	40	8	2	2	2	1	1	2	1	2	2	0	6	0	1	0	0	2	1	1	1	4	2	2	1	1	1	0	0	0
370	515�	1	36	3	0	1	5	2	1	2014.4	neurosurgery	1	2	3	2		1	2	2	40	6.6	2	3	2	2	2	2	2	1	1	0	8	1	1	1	1	2	1	1	1	12	14	8	1	2	1	1	2	1
371	826�	1	28	3	0	5	1	2	0	(skip)	orthopedic surgery	0	2	1	4		1	4	2	84	10	2	1	1	1	1	1	1	1	3	0	6	0	1	1	2	1	1	0	0	0	0	0	1	1	1	0	0	0
372	188�	1	26	3	0	5	1	2	0	(skip)	neurosurgery	1	3	1	2		1	2	2	40	8	1	3	2	2	2	2	2	1	1	0	6	0	1	1	0	1	1	1	1	2	0	0	1	1	1	1	0	0
373	352�	0	26	4	0	1	2	2	0	(skip)	general medicine	1	1	2	4		1	2	2	66	10	2	2	1	1	1	2	1	2	1	0	8	1	1	1	1	2	1	1	1	26	22	16	3	3	2	2	2	2
374	283�	0	24	2	1	4	2	1	0	(skip)	critical care medicine	0	1	3	2		1	1	1	50	7	2	2	2	1	1	2	1	1	1	0	9	1	1	1	2	2	1	1	1	12	2	8	1	1	1	1	1	1
375	328�	0	35	2	1	1	5	1	1	36	general practice	1	3	3	3		1	2	2	50	10	2	2	2	2	2	2	1	1	1	0	0	0	0	0	0	0	0	0	0	0	0	0	1	1	1	0	0	0
376	343�	1	29	2	1	4	1	2	0	(skip)	general medicine	1	2	2	3		1	4	3	95	15	2	1	1	1	1	3	1	1	1	0	3	0	0	0	1	1	1	0	0	0	0	0	1	1	1	0	0	0
377	469�	0	26	1	0	4	1	1	0	(skip)	(sth. or sb) else	1	3	2	2		1	4	2	35	7	1	1	1	1	1	2	1	1	1	0	0	0	0	0	0	0	0	0	0	4	2	0	1	1	1	1	0	0
378	498�	0	29	2	0	1	1	1	0	(skip)	ultrasound department	1	1	3	4		0	1	2	37.5	7.5	1	1	1	1	1	1	1	1	1	0	5	0	1	1	1	1	1	0	0	0	0	0	1	1	1	0	0	0
379	747�	0	23	1	0	2	3	1	0	(skip)	general medicine	0	1	2	3		1	4	2	30	7.5	2	2	1	1	1	2	1	1	1	0	13	1	2	2	2	3	2	1	1	10	10	8	1	2	1	0	1	1
380	331�	0	24	1	0	2	1	1	0	(skip)	general practice	0	1	1	2		1	4	2	50	8	2	2	2	2	2	2	2	2	1	0	8	1	1	1	1	2	1	1	1	12	0	6	1	1	1	1	0	1
381	537�	0	25	1	0	4	1	1	1	2021.9	general practice	1	3	2	2		1	4	1	42	8	2	1	1	2	2	2	1	1	1	0	0	0	0	0	0	0	0	0	0	0	0	0	1	1	1	0	0	0
382	897�	0	26	1	0	2	1	1	0	(skip)	radiology	1	3	3	2		1	3	3	48	8	2	2	2	2	2	2	1	1	1	0	11	1	1	1	2	2	1	2	2	16	14	12	2	2	2	1	1	1
383	311�	0	26	3	0	2	1	2	0	(skip)	ultrasound department	1	3	1	1		1	4	2	40	8	1	2	2	1	1	2	1	1	1	0	4	0	0	1	1	1	1	0	0	4	0	4	1	1	1	0	0	0
384	361�	1	27	2	0	2	1	1	0	(skip)	oral and maxillofacial surgery	0	2	3	2		1	2	2	70	10	1	1	1	1	1	2	1	1	1	0	1	0	0	0	1	0	0	0	0	0	2	0	1	1	1	0	1	0
385	307�	0	24	3	0	4	1	1	0	(skip)	emergency department	0	1	1	2		1	3	3	40	8	1	3	2	2	1	3	2	2	1	0	14	1	3	1	1	3	2	2	2	26	22	20	3	3	2	1	2	2
386	261�	0	27	3	0	5	5	2	0	(skip)	radiology	1	3	1	1		0	4	1	40	8	1	2	1	1	1	2	1	1	1	0	8	1	1	1	1	2	1	1	1	16	6	4	2	1	1	1	2	0
387	318�	1	26	3	1	1	2	1	0	(skip)	orthopedic surgery	1	3	1	2		1	4	2			2	3	3	3	2	3	2	2	1	0	8	1	1	1	1	2	1	1	1	8	12	10	1	2	1	1	2	1
388	301�	1	26	3	1	4	1	1	0	(skip)	urology	1	3	1	2		1	2	2	56	8	1	1	1	1	1	2	1	1	1	0	0	0	0	0	0	0	0	0	0	0	0	0	1	1	1	0	0	0
389	159�	0	23	3	1	4	4	2	0	(skip)	anesthesiology	0	1	1	3		1	1	1	50	10	1	1	1	1	1	2	1	1	1	0	0	0	0	0	0	0	0	0	0	2	0	0	1	1	1	0	0	0
390	753�	0	25	3	1	4	2	1	0	(skip)	general medicine	1	3	1	2		1	2	2	56	8	2	2	2	2	2	3	2	2	1	0	1	0	0	0	0	1	0	0	0	14	12	10	1	2	1	1	1	1
391	377�	0	28	1	0	2	1	1	0	(skip)	ultrasound department	0	1	2	2		1	1	2	40	8	1	1	1	1	1	1	1	1	1	0	2	0	0	0	1	1	0	0	0	0	0	0	1	1	1	0	0	0
392	271�	1	27	3	1	2	5	1	0	(skip)	neurosurgery	1	2	1	5		1	4	2	60	10	2	2	2	2	2	3	1	1	1	0	0	0	0	0	0	0	0	0	0	0	0	0	1	1	1	0	0	0
393	460�	0	30	2	1	2	2	2	0	(skip)	general medicine	1	2	3	4		1	2	2	64	10	3	2	1	2	2	2	1	1	1	0	4	0	0	1	1	2	0	0	0	2	4	6	1	1	1	0	1	1
394	510�	0	37	1	0	1	2	1	1	2021.3.5	orthopedic surgery	1	2	1	3		1	4	2	48	8	2	2	2	2	1	2	1	1	1	0	10	1	1	1	2	2	1	1	2	6	6	2	1	1	1	1	1	1
395	299�	0	24	1	0	4	1	1	0	(skip)	general medicine	0	1	1	2		1	1	4	50	9	2	1	2	2	1	2	1	1	1	0	2	0	1	0	0	1	0	0	0	0	0	0	1	1	1	0	0	0
396	309�	1	25	3	0	2	5	2	0	(skip)	anesthesiology	1	2	1	2		1	2	2	50	10	3	3	3	3	2	2	2	2	1	0	1	0	0	0	0	1	0	0	0	4	4	4	1	1	1	1	1	1
397	239�	0	25	3	0	2	5	1	0	(skip)	neurosurgery	1	2	1	3		1	4	1	40	7	2	3	2	2	2	2	2	1	1	0	3	0	1	0	1	1	0	0	0	0	0	0	1	1	1	0	0	0
398	519�	1	26	3	0	2	3	2	0	(skip)	neurosurgery	1	2	1	2		1	2	2	56	8	3	3	2	2	1	3	2	3	1	0	3	0	0	0	1	2	0	0	0	0	4	0	1	1	1	0	0	0
399	213�	1	26	3	1	2	1	1	0	(skip)	neurosurgery	1	2	1	2		1	2	2	63	9	3	3	3	3	2	3	3	1	1	0	1	0	0	0	0	1	0	0	0	0	0	0	1	1	1	0	0	0
400	472�	0	24	3	0	2	5	1	0	(skip)	general medicine	1	2	1	2		1	2	2	50	8	2	2	2	2	2	3	2	2	1	0	4	0	1	0	0	1	1	1	0	6	0	0	1	1	1	0	0	0
401	803�	0	25	3	0	4	6	2	0	(skip)	ultrasound department	1	3	1	2		1	2	2	40	8	1	1	1	1	1	2	1	1	1	0	7	0	1	1	1	1	1	1	1	10	10	0	1	2	1	1	2	0
402	294�	1	25	3	0	2	3	2	0	(skip)	neurosurgery	1	2	1	2		1	2	2	40	8	2	2	2	2	2	2	1	2	1	0	6	0	1	1	0	1	1	1	1	0	2	0	1	1	1	0	1	0
403	265�	0	27	3	0	2	1	2	0	(skip)	radiology	1	3	1	1		0	1	2	56	8	2	2	1	1	1	1	1	1	1	0	0	0	0	0	0	0	0	0	0	0	0	0	1	1	1	0	0	0
404	547�	1	26	3	0	5	5	2	0	(skip)	orthopedic surgery	1	3	1	3		1	4	2	60	10	3	2	1	1	1	3	1	3	2	1	13	1	2	1	1	4	2	1	2	26	10	10	3	2	1	1	1	1
405	274�	0	24	1	0	2	1	1	0	(skip)	general medicine	0	1	1	2		1	1	1	10	10	1	1	1	1	1	2	1	1	1	0	2	0	0	0	1	1	0	0	0	0	4	0	1	1	1	0	2	0
406	683�	0	29	2	0	1	2	1	0	(skip)	department of gynecology and obstetrics	0	3	3	3		1	4	2	55	9	1	1	1	1	1	3	1	1	1	0	7	0	0	1	1	2	1	1	1	6	10	6	1	2	1	0	3	1
407	3080�	0	25	2	1	5	2	1	0	(skip)	General Dentistry	0	1	2	2		1	3	1	40	8	2	1	1	1	1	2	1	1	1	0	7	0	1	1	1	2	1	0	1	10	6	2	1	1	1	1	1	0
408	409�	0	24	3	0	5	1	1	0	(skip)	neurosurgery	0	1	1	1		1	1	1	35	7	2	2	2	2	2	2	1	1	1	0	3	0	0	0	1	1	1	0	0	2	2	0	1	1	1	0	1	0
409	253�	0	26	3	0	4	5	2	0	(skip)	general medicine	1	2	1	2		1	2	2	48	7	2	2	2	2	1	2	2	2	1	0	2	0	0	0	1	1	0	0	0	0	2	0	1	1	1	0	0	0
410	274�	0	26	3	1	4	5	1	0	(skip)	general medicine	1	2	1	2		1	2	2	50	8	2	2	2	2	1	2	1	1	1	0	0	0	0	0	0	0	0	0	0	0	2	4	1	1	1	0	1	0
411	287�	1	27	3	0	4	1	1	0	(skip)	general medicine	0	2	1	1		1	4	3	40	8	3	2	2	2	1	2	1	3	1	0	8	1	1	1	1	1	2	1	1	14	14	14	1	2	2	1	1	1
412	344�	1	23	3	1	5	1	1	0	(skip)	orthopedic surgery	0	1	1	2		1	2	2	50	10	2	3	2	2	2	3	1	1	1	0	1	0	0	0	0	1	0	0	0	4	2	4	1	1	1	0	1	0
413	460�	0	25	3	0	4	5	1	0	(skip)	general medicine	1	2	1	2		1	2	3	84	12	3	3	3	3	2	2	1	1	1	0	0	0	0	0	0	0	0	0	0	20	8	20	2	1	2	0	2	1
414	583�	0	26	3	1	2	1	2	0	(skip)	general medicine	0	2	1	2		1	2	2	70	10	2	3	3	3	2	3	1	2	1	0	8	1	1	1	1	2	1	1	1	24	14	14	2	2	2	1	2	2
415	304�	0	29	3	0	2	5	1	0	(skip)	general medicine	1	2	1	1		1	2	2	58	8	2	2	2	2	1	2	2	1	1	0	0	0	0	0	0	0	0	0	0	2	0	0	1	1	1	0	0	0
416	450�	0	25	3	1	4	3	2	0	(skip)	emergency department	1	2	1	2		1	3	3	50	12	3	2	2	2	2	2	1	2	1	0	5	0	1	0	0	1	1	1	1	14	10	8	1	2	1	1	1	1
417	436�	0	26	3	0	5	5	2	0	(skip)	radiology	1	3	1	2		1	4	4	58	10	2	2	2	2	2	2	2	3	1	0	8	1	1	1	1	2	1	1	1	4	4	2	1	1	1	0	1	0
418	459�	0	26	3	0	2	5	2	0	(skip)	radiology	1	3	1	2		1	4	4	58	10	2	2	2	2	2	3	2	3	1	0	8	1	1	1	1	2	1	1	1	12	14	6	1	2	1	1	1	0
419	813�	0	28	2	0	2	1	1	0	(skip)	anesthesiology	1	1	3	4		1	4	1	65	13	2	2	2	2	2	3	1	1	1	0	2	0	0	0	0	2	0	0	0	0	2	0	1	1	1	0	0	0
420	957�	0	25	3	0	4	2	2	1	2年	general medicine	1	2	1	3		1	3	3	70	9	2	2	2	2	2	2	1	1	1	1	8	1	1	1	1	2	1	1	1	14	14	14	1	2	2	1	1	1
421	445�	1	25	3	0	2	3	2	0	(skip)	general medicine	1	2	1	1		1	2	2	50	8	2	2	2	1	1	2	1	1	1	0	3	0	1	0	0	1	0	0	1	2	8	2	1	1	1	1	2	1
422	190�	1	26	3	1	2	1	1	0	(skip)	general medicine	1	3	1	3		1	2	2	45	7	1	1	1	1	1	1	1	1	1	0	0	0	0	0	0	0	0	0	0	0	0	0	1	1	1	0	0	0
423	451�	1	24	3	1	2	1	2	0	(skip)	anesthesiology	0	1	1	2		1	4	2	50	7.1	2	2	2	2	1	3	1	1	1	0	4	0	0	0	1	1	1	1	0	0	0	4	1	1	1	0	0	0
424	495�	0	27	1	0	2	1	1	0	(skip)	general practice	1	2	2	3		1	3	3	40	8	2	2	1	1	1	2	1	1	1	0	3	0	1	0	1	1	0	0	0	0	0	0	1	1	1	0	0	0
425	765�	0	24	3	0	2	5	1	0	(skip)	general medicine	1	2	1	1		1	4	1	58	8	2	2	2	2	2	2	1	2	1	0	7	0	1	0	1	2	1	1	1	10	4	4	1	1	1	0	0	0
426	309�	1	25	3	0	2	5	2	0	(skip)	neurosurgery	1	2	1	2		1	4	2	56	8	2	3	3	2	2	3	1	2	2	1	1	0	0	0	0	1	0	0	0	16	4	18	2	1	2	1	1	1
427	340�	0	25	3	0	5	5	1	0	(skip)	department of gynecology and obstetrics	0	1	1	3		1	2	2	49	7	2	1	1	1	1	2	1	1	1	0	1	0	0	0	0	1	0	0	0	10	2	0	1	1	1	0	1	0
428	333�	0	24	3	0	2	6	1	0	(skip)	radiology	1	2	1	2		0	1	2	40	5.7	2	2	2	2	1	2	1	1	1	0	2	0	1	0	0	1	0	0	0	0	0	0	1	1	1	0	0	0
429	272�	0	24	3	0	5	6	1	0	(skip)	anesthesiology	0	1	1	2		1	4	1	55	11	2	2	2	2	1	2	1	1	1	0	2	0	0	0	1	1	0	0	0	8	14	0	1	2	1	0	2	0
430	3017�	1	30	1	0	1	1	1	1	36	orthopedic surgery	1	2	3	2		1	4	2	50	7	2	2	2	2	1	2	1	2	1	0	5	0	1	0	0	2	1	0	1	4	4	8	1	1	1	0	1	1
431	386�	0	27	2	0	1	2	1	0	(skip)	general practice	1	3	2	4		0	1	1	50	9	2	1	1	1	1	2	1	1	1	0	8	1	1	1	1	2	1	1	1	8	6	2	1	1	1	0	1	0
432	334�	0	25	3	0	2	4	1	0	(skip)	emergency department	1	2	1	2		1	3	3	60	12	3	2	2	2	2	2	2	1	1	0	7	0	2	0	0	2	1	1	1	14	12	14	1	2	2	1	1	1
433	250�	1	23	3	0	3	5	1	0	(skip)	neurosurgery	1	1	1	5		1	4	4	60	10	3	3	3	3	2	3	3	3	3	1	28	3	4	4	4	4	4	4	4	14	14	14	1	2	2	1	1	1
434	700�	0	26	3	0	4	5	1	0	(skip)	emergency department	1	2	1	2		1	3	3	50	7	1	2	2	2	2	2	1	1	1	0	5	0	1	1	0	1	1	0	1	8	14	2	1	2	1	0	3	0
435	1226�	0	25	3	0	4	5	1	0	(skip)	general medicine	1	2	1	1		1	4	2	56	8	2	2	2	2	2	2	1	1	1	0	6	0	1	0	1	1	1	1	1	2	4	0	1	1	1	0	1	0
436	188�	0	26	3	0	5	3	1	0	(skip)	general medicine	1	2	1	1		1	2	2	45	9	2	2	2	2	2	2	1	1	1	0	8	1	1	1	1	2	1	1	1	14	14	14	1	2	2	1	1	1
437	376�	0	29	3	0	2	5	2	0	(skip)	emergency department	1	2	1	2		1	2	2	45	9	2	2	2	2	2	2	1	1	1	0	8	1	1	1	1	2	1	1	1	2	2	2	1	1	1	0	0	0
438	310�	0	24	3	1	4	4	2	0	(skip)	general medicine	1	2	1	2		1	2	2	40	8	3	3	2	2	2	2	2	1	1	0	8	1	1	1	1	2	1	1	1	12	4	10	1	1	1	1	1	1
439	680�	1	25	3	0	4	5	1	0	(skip)	radiology	1	2	1	3		1	1	4	60	10	2	2	2	2	2	2	1	3	1	0	4	0	1	1	0	2	0	0	0	0	2	0	1	1	1	0	1	0
440	3506�	0	26	3	1	2	5	1	0	(skip)	general medicine	1	2	1	2		1	4	2	60	8	3	1	1	1	1	2	1	1	1	0	0	0	0	0	0	0	0	0	0	0	0	0	1	1	1	0	0	0
441	796�	0	26	2	0	4	1	1	0	(skip)	general medicine	0	1	2	2		1	4	3	84	12	2	2	1	2	2	2	1	1	1	0	9	1	1	1	2	2	1	1	1	2	6	6	1	1	1	0	2	1
442	430�	0	26	1	0	2	1	1	0	(skip)	psychiatry	0	3	1	2		1	4	2	40	8	2	3	2	2	2	3	1	1	1	0	1	0	0	0	0	1	0	0	0	6	6	8	1	1	1	0	1	1
443	236�	1	26	3	0	4	5	1	0	(skip)	neurosurgery	1	2	1	4		1	2	2	70	10	3	3	3	3	3	2	2	2	1	0	12	1	2	1	0	3	2	2	2	14	12	14	1	2	2	1	0	1
444	930�	0	24	3	1	2	5	2	0	(skip)	anesthesiology	1	3	1	2		1	2	2	55	11	1	1	1	1	1	2	1	1	1	0	4	0	0	0	0	1	1	1	1	0	2	0	1	1	1	0	0	0
445	318�	1	28	3	0	4	1	1	0	(skip)	emergency department	1	3	1	2		1	2	2	64	9	3	2	3	2	2	3	1	2	1	0	14	1	1	2	1	2	3	3	2	24	20	20	2	3	2	2	1	2
446	403�	0	26	3	1	5	5	2	0	(skip)	ultrasound department	1	3	1	2		1	4	2	32	5	2	2	2	2	2	2	1	1	1	0	11	1	1	2	2	3	1	1	1	6	14	6	1	2	1	0	2	1
447	518�	0	26	2	0	2	1	1	0	(skip)	ultrasound department	0	1	2	2		0	1	2	40	8	2	2	2	2	1	3	1	1	1	0	6	0	1	1	1	1	0	1	1	4	0	6	1	1	1	0	0	0
448	540�	0	29	3	0	5	5	2	1	2018年9�	anesthesiology	1	3	1	3		1	4	2	50	10	2	2	2	2	1	3	1	1	1	0	3	0	1	0	0	2	0	0	0	2	2	4	1	1	1	0	0	0
449	296�	1	24	3	0	2	1	1	0	(skip)	neurosurgery	0	1	1	2		1	2	2	60	12	1	1	1	1	1	2	1	1	1	0	1	0	0	0	1	0	0	0	0	2	2	0	1	1	1	0	0	0
450	789�	0	25	2	0	4	1	1	0	(skip)	otolaryngology	1	1	2	3		1	3	2	60	10	2	2	2	2	2	3	1	2	1	0	6	0	1	1	1	1	1	1	0	4	6	6	1	1	1	0	2	0
451	465�	1	24	3	0	4	3	2	0	(skip)	radiology	1	2	1	3		1	1	1	50	10	3	3	2	2	1	2	1	1	1	0	15	2	3	2	2	2	2	2	2	4	8	6	1	1	1	2	1	0
452	532�	0	32	3	1	2	1	2	1	49月	anesthesiology	1	1	1	3		1	1	1	60	12	1	1	1	1	1	3	1	1	1	0	0	0	0	0	0	0	0	0	0	4	4	6	1	1	1	0	0	0
453	568�	0	35	3	0	1	2	1	1	108	ultrasound department	1	2	1	2		1	2	2	32	7	1	1	1	1	1	1	1	1	1	0	6	0	1	1	1	2	0	0	1	0	2	0	1	1	1	0	0	0
454	1748�	0	28	1	0	5	1	1	1	2020.11	Clinical Pathology	0	3	2	2		0	1	2	66	11	2	1	2	1	1	3	1	1	1	0	15	2	2	2	1	3	3	2	2	22	22	18	2	3	2	2	2	2
455	546�	0	35	2	1	1	2	1	1	2013年9�	neurosurgery	1	2	2	3		1	2	2	50		1	1	1	1	1	3	1	1	1	0	3	0	0	0	2	1	0	0	0	2	0	0	1	1	1	0	0	0
456	488�	0	24	3	0	4	1	1	0	(skip)	anesthesiology	0	1	1	1		1	2	2	60	12	1	1	1	1	1	2	1	1	1	0	1	0	0	0	0	1	0	0	0	0	2	0	1	1	1	0	0	0
457	470�	1	26	3	0	5	1	1	0	(skip)	general medicine	0	1	1	1		1	2	2	45	8	1	1	1	1	1	2	1	1	1	0	1	0	0	0	0	1	0	0	0	0	0	0	1	1	1	0	0	0
458	489�	1	26	3	1	5	5	1	0	(skip)	thoracic surgery	0	2	1	3		1	4	4	50	10	2	2	2	2	1	1	2	2	2	0	9	1	2	0	0	2	3	1	1	8	4	6	1	1	1	1	0	0
459	458�	0	24	3	0	5	5	2	0	(skip)	anesthesiology	0	1	1	2		1	1	2	55	11	1	2	2	1	1	3	1	1	1	0	7	0	0	0	2	2	1	1	1	2	2	0	1	1	1	0	1	0
460	395�	1	28	3	0	2	6	1	0	(skip)	radiology	1	3	1	2		0	1	1	32	6	2	1	1	1	1	2	1	1	1	1	0	0	0	0	0	0	0	0	0	0	0	0	1	1	1	0	0	0
461	423�	1	26	3	1	5	5	1	0	(skip)	radiology	1	2	1	2		1	1	2	50	8	2	2	2	2	2	2	1	2	1	0	3	0	1	0	0	1	1	0	0	0	2	0	1	1	1	0	0	0
462	388�	1	25	3	1	4	5	2	0	(skip)	radiology	1	2	1	1		1	1	1	8	8	2	2	2	2	1	2	1	2	1	0	3	0	0	0	1	2	0	0	0	0	0	0	1	1	1	0	0	0
463	548�	0	27	3	1	4	3	1	0	(skip)	ultrasound department	1	2	1	2		1	1	2	20	3	1	1	1	1	1	2	1	2	1	0	9	1	2	1	1	2	1	1	1	8	4	8	1	1	1	0	0	1
464	516�	1	29	2	0	1	2	1	1	20	neurosurgery	0	1	3	4		1	2	2	50	9	2	1	1	1	1	2	1	1	1	0	4	0	0	0	0	1	3	0	0	2	10	24	1	2	3	0	0	1
465	301�	0	25	3	0	2	3	1	0	(skip)	department of gynecology and obstetrics	0	1	1	1		1	2	2	56	8	2	2	2	2	2	2	1	2	1	0	3	0	1	0	1	1	0	0	0	6	0	4	1	1	1	1	0	2
466	489�	1	25	3	0	5	5	3	0	(skip)	orthopedic surgery	1	2	1	4		1	2	2	50	10	1	1	1	1	1	1	1	1	2	0	0	0	0	0	0	0	0	0	0	0	0	0	1	1	1	0	0	0
467	473�	1	24	3	0	4	6	2	0	(skip)	general medicine	1	2	1	2		1	2	2	84	12	3	3	2	2	1	3	2	3	2	1	13	1	2	2	0	3	2	2	2	14	14	14	1	2	2	1	1	1
468	223�	1	29	3	1	4	4	2	0	(skip)	neurosurgery	0	2	1	1		1	4	4	90	14	2	1	1	1	1	2	1	1	1	0	5	0	1	1	1	1	1	0	0	0	6	0	1	1	1	0	0	0
469	387�	1	28	2	1	2	5	1	0	(skip)	general practice	0	3	2	3		1	2	2	50	10	3	3	1	2	2	3	1	3	1	0	10	1	3	0	1	2	2	0	2	20	14	18	2	2	2	2	1	1
[truncated: 71 more columns]
