# Supplementary material
Source: Research Square preprint supplement (doi:10.21203/rs.3.rs-8598823/v1)
Supplement: Supplementary file 2 [file 9961e623ea48e72b9b41a99f.docx]

# Supplementary File 3: English Version of the Self-Designed Socio-Demographic and Work-Related Questionnaire

## Instructions

This questionnaire is designed to collect information on your socio-demographic characteristics, work-related conditions, and subjective perceptions during residency training. All responses are anonymous and will be used solely for research purposes. Please select the option that best matches your situation or fill in the blank as required. The survey will take approximately 15 minutes to complete. Thank you for your valuable participation!

## Part A: Socio-Demographic and Professional Information

1. Gender: □ Male □ Female
2. Age (years): □ 22-24 □ 25-26 □ ≥27
3. Educational background: □ Bachelor □ Master □ Doctor
4. Degree type (for master’s degree holders): □ Professional master’s □ Academic master’s
5. Training grade: □ First year □ Second year □ Third year
6. Department: □ Internal Medicine □ Surgery □ Emergency Medicine □ Obstetrics & Gynecology □ Pediatrics □ Orthopedics □ Anesthesiology □ Neurology □ Radiology □ Other: ______ iatrics
7. Monthly income (RMB): □ <2000 □ 2000-3999 □ ≥4000
8. Monthly consumption (RMB): □ 000 □ 1000-1999 □ ≥2000
9. Marital status: □ Single (no partner) □ Single (with partner) □ Married □ Other: ______
10. Living arrangement: □ Living alone □ Living with family □ Sharing with colleagues □ Other: ______
11. Are you an only child?: □ Yes □ No
12. Do you have work experience prior to residency training?: □ Yes □ No
    - If yes, duration of work experience (months): ______
13. Have you passed the National Medical Licensing Examination?: □ Yes □ No
14. Weekly working hours (mean): □ ≤40 □ 41-50 □ 51-60 □ >60
15. Average monthly on-call frequency since the start of residency training: □ 1-2 times □ 3-5 times □ ≥6 times
16. Self-reported work stress: □ Low □ Medium □ High

## Part B: Work-Related Factors & Subjective Perceptions

1. Do you have night shifts?: □ Yes □ No
   - If yes, how many night shifts per month?: □ ≤3 □ 4-6 □ ≥7
2. Are you satisfied with your current income level?: □ Very satisfied □ Satisfied □ Neutral □ Dissatisfied □ Very dissatisfied
3. Do you think your workload is reasonable?: □ Very reasonable □ Reasonable □ Neutral □ Unreasonable □ Very unreasonable
4. Does your residency training work bring you a sense of accomplishment?: □ Very much □ To a certain extent □ Neutral □ Slightly not □ Not at all
5. What is your attitude towards the residency training system?: □ Very positive □ Positive □ Neutral □ Negative □ Very negative
6. What is your attitude towards the training hospital?: □ Very positive □ Positive □ Neutral □ Negative □ Very negative
7. What is your attitude towards the training department?: □ Very positive □ Positive □ Neutral □ Negative □ Very negative
8. What is your attitude towards the supervising teachers?: □ Very positive □ Positive □ Neutral □ Negative □ Very negative
9. Have you had conflicts with department teachers?: □ Yes □ No
10. Have you had conflicts with patients?: □ Yes □ No
11. Do you smoke?: □ Yes □ No
12. Do you drink alcohol?: □ Yes □ No

## Notes

1. This questionnaire was developed specifically for the study "Dual Pressure of Low Income and High Workload: Impact on Mental Health and Sleep Quality Among Chinese Medical Residents, and the Buffering Role of Social Support".
2. The Chinese version was used for data collection, and this English version is provided for transparency and peer review in accordance with the journal’s requirements.
3. For further inquiries about the questionnaire, please contact the corresponding author: Xiajin Ren (E-mail: renxiajin@126.com).
4. All response options are mutually exclusive and exhaustive, and no personal identifiable information is collected to ensure anonymity.
