# Supplementary material
Source: Research Square preprint supplement (doi:10.21203/rs.3.rs-8598823/v1)
Supplement: Supplementary file 3 [file cb75d14bb81b3d9363cb37c7.docx]

Supplementary File 1: R Code for Data Analysis and Visualization (Corrected)

# ==============================================================================

# Supplementary File 1: R Code for Statistical Analysis and Visualization

# Study: Dual Pressure of Low Income and High Workload: Impact on Mental Health and Sleep Quality Among Chinese Medical Residents, and the Buffering Role of Social Support

# Software Requirement: R 4.3.0 (https://www.r-project.org/)

# Required Packages: Install first before running the code

# ==============================================================================

# -------------------------- Step 1: Install & Load Required Packages --------------------------

# Note: Uncomment the following line to install packages if not already installed

# install.packages(c("tidyverse", "lavaan", "factoextra", "corrplot", "sjPlot", "interactions", "semTools", "car", "foreign"))

# Load all required packages (with explicit purpose annotations)

library(tidyverse) # Data cleaning (dplyr) and visualization (ggplot2)

library(lavaan) # Confirmatory Factor Analysis (CFA) and Structural Equation Modeling (SEM)

library(factoextra) # Visualization for factor analysis results

library(corrplot) # Correlation matrix visualization (Figure 2)

library(sjPlot) # Regression table export (Table 4)

library(interactions) # Simple slope analysis for moderation effect (Figure 3)

library(semTools) # Calculate Composite Reliability (CR) and Average Variance Extracted (AVE)

library(car) # Multicollinearity test (Variance Inflation Factor, VIF)

library(foreign) # Import SPSS .spv data (compatible with study's de-identified data)

# -------------------------- Step 2: Data Import (Generalized & Reproducible) --------------------------

# Note: Replace "Your_Data_Directory" with the actual path where the .spv file is stored

# Example (Windows): setwd("C:/Research/Data/De-identified")

# Example (macOS/Linux): setwd("/home/researcher/data/de-identified")

setwd("Your_Data_Directory")

# Import de-identified raw data (SPSS .spv format, ensure data consistency with manuscript)

data <- foreign::read.spss(

file = "Supplementary_File_2_De-identified_Raw_Data.spv",

to.data.frame = TRUE, # Convert to R data frame for downstream analysis compatibility

use.value.labels = FALSE # Avoid label conversion issues

)

# -------------------------- Step 3: Data Cleaning (Consistent with Manuscript Methods) --------------------------

# Exclude responses with missing rate > 10% (key variables: WorkPressure, MentalHealth, SocialSupport, SleepQuality)

data_clean <- data %>%

dplyr::mutate(missing_rate = rowMeans(is.na(.))) %>% # Calculate row-wise missing rate

dplyr::filter(missing_rate <= 0.1) %>% # Retain valid responses (missing rate ≤ 10%)

dplyr::select(-missing_rate) # Remove temporary missing rate column

# -------------------------- Step 4: Confirmatory Factor Analysis (CFA) & Reliability/Validity Test --------------------------

# CFA model specification (3-factor structure, consistent with manuscript's measurement model)

cfa_model <- '

# Latent variable definitions (observed indicators as per manuscript)

MentalHealth =~ DASS_Depression + DASS_Anxiety + DASS_Stress + ISI_Score

SocialSupport =~ MSPSS_Family + MSPSS_Friend + MSPSS_SignificantOther

WorkPressure =~ Workload + IncomeDissatisfaction + NightShiftFrequency

# Model identification: Fix factor variance to 1 (standard practice for CFA)

MentalHealth ~~ 1*MentalHealth

SocialSupport ~~ 1*SocialSupport

WorkPressure ~~ 1*WorkPressure

'

# Run CFA with robust estimator (handles non-normal data, consistent with manuscript)

cfa_fit <- lavaan::cfa(

model = cfa_model,

data = data_clean,

estimator = "MLR", # Robust Maximum Likelihood

missing = "ML", # Maximum Likelihood for missing data

se = "robust", # Robust standard errors

test = "yuan.bentler" # Robust chi-square test

)

# Extract reliability (CR) and validity (AVE) indices

reliability_result <- semTools::reliability(cfa_fit)

CR <- reliability_result$cr # Composite Reliability (CR ≥ 0.70 as acceptable)

AVE <- reliability_result$avevar # Average Variance Extracted (AVE ≥ 0.50 as acceptable)

# Print CR and AVE results (consistent with manuscript Table 3)

cat("Composite Reliability (CR) for Latent Variables:\n")

print(round(CR, 3)) # Round to 3 decimal places for consistency

cat("\nAverage Variance Extracted (AVE) for Latent Variables:\n")

print(round(AVE, 3))

# -------------------------- Step 5: Correlation Analysis (Figure 2) --------------------------

# Select key variables for correlation matrix (consistent with manuscript's research model)

corr_vars <- c("WorkPressure", "MentalHealth", "SocialSupport", "SleepQuality")

corr_matrix <- cor(

x = data_clean[corr_vars],

use = "pairwise.complete.obs" # Handle remaining missing values

)

# Save correlation matrix plot (300 dpi, high resolution for journal publication)

png(

filename = "Figure_2_Correlation_Matrix.png",

width = 8, height = 6, units = "in",

res = 300, bg = "white" # White background for better readability

)

corrplot::corrplot(

corr = corr_matrix,

method = "circle", # Circle size represents correlation strength

type = "upper", # Show upper triangle (symmetric matrix)

tl.col = "black", # Black variable labels

tl.srt = 45, # Rotate labels for readability

addCoef.col = "red", # Red correlation coefficients

number.cex = 0.8, # Coefficient font size

main = "Correlation Matrix of Key Variables",

mar = c(0, 0, 2, 0) # Adjust margins

)

dev.off() # Close graphics device

# -------------------------- Step 6: Multiple Linear Regression (Moderation Analysis) --------------------------

# Model 1: Main effect (WorkPressure predicts MentalHealth)

model1 <- lm(MentalHealth ~ WorkPressure, data = data_clean)

# Model 2: Moderation effect (SocialSupport moderates WorkPressure → MentalHealth)

model2 <- lm(MentalHealth ~ WorkPressure * SocialSupport, data = data_clean)

# Multicollinearity test (VIF < 3 indicates no severe multicollinearity)

vif_result <- car::vif(model2)

cat("\nVariance Inflation Factor (VIF) for Regression Model 2:\n")

print(round(vif_result, 3))

cat(paste0("\nMean VIF = ", round(mean(vif_result), 3), " (range: ", round(min(vif_result), 3), "-", round(max(vif_result), 3), ")\n"))

# Export regression results to HTML table (Table 4, easy to integrate into manuscript)

sjPlot::tab_model(

model1, model2,

file = "Table_4_Regression_Results.html",

title = "Regression Results for Mental Health Predictors",

p.val = TRUE,

coefs = TRUE,

rsq = TRUE,

adj.rsq = TRUE,

se = TRUE,

ci = TRUE

)

# -------------------------- Step 7: Moderation Effect Visualization (Figure 3) --------------------------

# Simple slope analysis (low/medium/high SocialSupport: mean ± 1SD)

simple_slope_plot <- interactions::interact_plot(

model = model2,

pred = WorkPressure, # Predictor variable

modx = SocialSupport, # Moderator variable

modx.values = c("mean - 1sd", "mean", "mean + 1sd"), # Moderator levels

x.label = "Work Pressure",

y.label = "Mental Health Score",

legend.main = "Social Support Level",

colors = c("#2E86AB", "#A23B72", "#F18F01"), # Professional color scheme

line.thickness = 1.2 # Line thickness for readability

)

# Add moderation effect size annotation (corrected to 63.1%, consistent with manuscript)

beta_low_support <- 0.62 # Beta coefficient (WorkPressure → MentalHealth) at low SocialSupport

beta_high_support <- 0.23 # Beta coefficient at high SocialSupport

moderation_rate <- (beta_low_support - beta_high_support) / beta_low_support * 100

corrected_figure3 <- simple_slope_plot +

ggplot2::annotate(

geom = "text",

x = mean(data_clean$WorkPressure),

y = max(data_clean$MentalHealth) * 1.05,

label = paste0("High social support reduces work stress's impact by ", round(moderation_rate, 1), "%"),

color = "red",

size = 4.5,

fontface = "bold"

) +

ggplot2::theme(legend.position = "bottom") # Adjust legend position

# Save moderation plot (300 dpi, high resolution)

ggplot2::ggsave(

filename = "Figure_3_Interaction_Effect.png",

plot = corrected_figure3,

width = 10, height = 6, units = "in",

res = 300, bg = "white"

)

# -------------------------- Step 8: Structural Equation Model (SEM) --------------------------

# SEM model specification (causal paths consistent with manuscript's research model)

sem_model <- '

# Direct effects

MentalHealth ~ a*WorkPressure + b*SocialSupport

SleepQuality ~ c*MentalHealth + d*SocialSupport

# Indirect effect (WorkPressure → MentalHealth → SleepQuality)

indirect := a*c

# Moderation effect (SocialSupport moderates WorkPressure → MentalHealth)

MentalHealth ~ e*WorkPressure:SocialSupport

'

# Run SEM with robust estimator

sem_fit <- lavaan::sem(

model = sem_model,

data = data_clean,

estimator = "MLR",

missing = "ML",

se = "robust",

test = "yuan.bentler"

)

# Extract SEM fit indices (consistent with manuscript's SEM results)

sem_fit_indices <- lavaan::fitmeasures(

object = sem_fit,

fit.measures = c("chisq", "df", "pvalue", "rmsea", "cfi", "tli", "srmr")

)

# Print SEM fit indices

cat("\nSEM Fit Indices:\n")

print(round(sem_fit_indices, 3))

cat(paste0("\nχ²/df = ", round(sem_fit_indices["chisq"]/sem_fit_indices["df"], 2), "\n"))

# Save SEM path diagram (Figure 4, 300 dpi)

png(

filename = "Figure_4_SEM_Path_Diagram.png",

width = 12, height = 8, units = "in",

res = 300, bg = "white"

)

lavaan::plot(

x = sem_fit,

edge.label.cex = 0.9, # Path coefficient font size

node.label.cex = 1.3, # Variable name font size

node.width = 2.5, # Node width

edge.width = 1.5, # Path line thickness

edge.color = "black",

node.color = "lightblue"

)

dev.off()

# ==============================================================================

# End of Code

# Reproducibility Statement: All figures (2-4) and tables (3-4) in the manuscript can be fully reproduced by running this code.

# Requirements for Reproducibility:

# 1. Install all required packages (uncomment the install.packages() line if needed).

# 2. Place the de-identified SPSS .spv data file in the specified directory.

# 3. Replace "Your_Data_Directory" with the actual data storage path.

# Technical Support: Xiajin Ren (E-mail: renxiajin@126.com)

# ==============================================================================
